1 **A cytomegalovirus immunevasin triggers integrated stress response-dependent**  
2 **reorganization of the endoplasmic reticulum.**

3

4 **Running Title: HCMV UL148 reorganizes the ER.**

5

6 Hongbo Zhang<sup>a,1</sup>, Clarissa Read<sup>d,e,1</sup>, Christopher C. Nguyen<sup>a,1</sup>, Mohammed N.A.

7 Siddiquey<sup>a</sup>, Chaowei Shang<sup>c</sup>, Cameron M. Hall<sup>a</sup>, Jens von Einem<sup>d</sup>, and Jeremy P.

8 Kamil<sup>a,b</sup> #

9

10 <sup>a</sup>Department of Microbiology and Immunology,

11 <sup>b</sup>Center for Molecular and Tumor Virology

12 <sup>c</sup>Research Core Facility

13 LSU Health Sciences Center, Shreveport, Louisiana, USA

14

15 <sup>d</sup> Institute of Virology, Ulm University Medical Center,

16 <sup>e</sup>Central Facility for Electron Microscopy, Ulm University

17 Ulm, Germany

18 <sup>1</sup> these authors contributed equally to the study

19

20

21 Running Head: HCMV UL148 Remodels the ER

22

23 #Address correspondence to Jeremy P. Kamil, [jkamil@lsuhsc.edu](mailto:jkamil@lsuhsc.edu)

24

25 **ABSTRACT.** Human cytomegalovirus (HCMV) encodes an ER-resident glycoprotein,  
26 UL148, which activates the unfolded protein response (UPR) but is fully dispensable for  
27 viral replication in cultured cells. Hence, its previously ascribed roles in immune  
28 evasion and modulation of viral cell tropism are hypothesized to cause ER stress. Here,  
29 we show that UL148 is necessary and sufficient to drive the formation of large ER-  
30 derived structures that occupy up to 7% of the infected cell cytosol. The structures are  
31 found to be sites where UL148 coalesces together with cellular proteins involved in ER  
32 quality control, such as Hrd1 and EDEM1. Ultrastructural analyses of the structures  
33 reveal tortuous, densely packed segments of collapsed ER which connect to distended  
34 cisternae. Notably, UL148 accumulates in a detergent-insoluble form during infection  
35 while a homologous rhesus cytomegalovirus immunevasin that fails to cause ER  
36 reorganization remains soluble. During induced ectopic expression of a UL148-GFP  
37 fusion protein, punctate signals traffic to accumulate at prominent structures that exhibit  
38 poor recovery of fluorescence after photobleaching. Small molecule blockade of the  
39 integrated stress response (ISR) prevents the formation of puncta, leading to a uniform  
40 reticular fluorescent signal. Accordingly, ISR inhibition during HCMV infection abolishes  
41 the coalescence of UL148 and Hrd1 into discrete structures. Given that UL148  
42 stabilizes immature forms of a receptor binding subunit for a viral envelope glycoprotein  
43 complex of pivotal importance for HCMV infectivity, which is otherwise particularly  
44 susceptible to ER associated degradation, our results imply that stress-dependent ER  
45 remodeling contributes to viral cell tropism.

46

47

48 **IMPORTANCE.**

49 Perturbations to ER morphology occur during infection with various intracellular  
50 pathogens and in certain genetic disorders. We identify that an HCMV gene product,  
51 UL148, profoundly reorganizes the ER during infection, and is sufficient to do so when  
52 expressed on its own. Our results reveal that UL148-dependent reorganization of the  
53 ER is a prominent feature of HCMV infected cells. Moreover, we find that this example  
54 of virally induced organelle remodeling requires the integrated stress response (ISR), a  
55 stress adaptation pathway that contributes to a number of disease states. Since ER  
56 reorganization accompanies the roles of UL148 in HCMV cell tropism and intracellular  
57 retention of the immune cell co-stimulatory ligand CD58, our results may have  
58 implications for understanding the mechanisms involved. Furthermore, our findings  
59 provide a basis to utilize UL148 as a tool to investigate organelle responses to stress  
60 and to identify novel drugs targeting the ISR.

## 61 INTRODUCTION.

62 UL148 is a human cytomegalovirus (HCMV) ER-resident glycoprotein that plays  
63 roles in evasion of cell-mediated immunity and shows intriguing effects on cell tropism.  
64 During infection of epithelial cells, viruses disrupted for *UL148* replicate to produce  
65 roughly 100-fold enhanced levels of infectious progeny virions compared to wildtype (1).  
66 These effects correlate with reduced expression of glycoprotein O (gO), a subunit of a  
67 heterotrimeric viral glycoprotein H (gH) / glycoprotein L (gL) complex (gH/gL/gO) on the  
68 virion envelope that is required for the infectivity of cell-free virions (2-4), and which  
69 endows the virus with the capacity to utilize the platelet derived growth factor receptor  $\alpha$   
70 (PDGFR $\alpha$ ) as an entry receptor (5-7). Accordingly, UL148 has been found to stabilize  
71 immature forms of gO prior their assembly into gH/gL/gO heterotrimers (1, 8). Despite  
72 that UL148 does not stably associate with gO, the data suggest that it may interact with  
73 gH (1).

74 UL148 also physically associates with CD58 (LFA-3), a co-stimulatory ligand for  
75 natural killer cells and T-lymphocytes, preventing its presentation at cell surface (9).  
76 Although the mechanisms by which UL148 stabilizes gO and retains CD58 within the  
77 ER remain unknown, UL148 strongly contributes to activation of the unfolded protein  
78 response (UPR) during infection, and is sufficient to activate the UPR when ectopically  
79 expressed in non-infected cells (10). UL148 co-purifies from infected cells with SEL1L,  
80 an adaptor subunit of ER-based E3 ubiquitin ligase Hrd1 that plays important roles in  
81 ER-associated degradation (ERAD) of terminally misfolded glycoproteins (8). This  
82 suggests a physical interaction with ERAD machinery, which may be germane to the  
83 mechanism by which UL148 activates the UPR.

84            Here, we show that expression of UL148 is necessary and sufficient to induce  
85 unusual ER structures at which large quantities of ER factors involved in glycoprotein  
86 quality control accumulate. In electron microscopy analyses, we find that the UL148  
87 induced ER-structures are comprised of densely packed, tortuous ER membranes that  
88 form connections with tubules of highly distended cisternal space. Our results may  
89 have implications for understanding the mechanisms by which UL148 regulates viral cell  
90 tropism and contributes to viral evasion of cell-mediated immunity. Further, our findings  
91 suggest that ER remodeling events triggered by UL148 are indicative of an adaptive  
92 response of eukaryotic cells to proteotoxic stress involving the secretory pathway.  
93

94 **RESULTS.**

95

96 **UL148 causes reorganization of ER quality control proteins into unusual globular**  
97 **structures.**

98         The HCMV ER-resident glycoprotein UL148 was previously observed to co-  
99 localize with the ER marker calnexin during infection (1). Nonetheless, calnexin staining  
100 did not show the uniform reticular pattern characteristic for the ER marker. We later  
101 noticed that cells infected with a *UL148*-null virus showed uniform calnexin staining (see  
102 below). To formally determine whether UL148 influences calnexin localization, we  
103 compared fibroblasts at four days post-infection with either wildtype (TB\_WT) or *UL148*-  
104 null mutant (TB\_148<sub>STOP</sub>) viruses derived from an infectious bacterial artificial  
105 chromosome (BAC) clone of HCMV strain TB40/E (**FIG 1**). In cells infected with  
106 wildtype virus, calnexin antibodies stained unusual globular structures at the cell  
107 periphery, as expected (1) (**FIG 1A, 1C, SI FIG S1A**). However, in cells infected with  
108 the *UL148*-null virus, calnexin staining was uniform throughout the cytosol (**FIG 1B-C**),  
109 as would be expected for an ER marker in uninfected cells. The staining pattern for  
110 Hrd1, another ER marker, likewise indicated accumulation at unusual globular  
111 structures during wildtype HCMV infection, but not during infection with *UL148*-null  
112 mutant viruses (**FIG 1, SI FIG S1A**). Because calnexin and Hrd1 staining showed  
113 uniform distribution in *UL148*-null virus infected cells, and because *UL148* is fully  
114 dispensable for efficient viral replication in fibroblasts (1), these results suggest that  
115 redistribution of these ER markers depends on UL148.

116 As expected (11, 12), antibodies specific for the HCMV envelope glycoprotein,  
117 glycoprotein H (gH), stained a juxtannuclear compartment, termed the cytoplasmic virion  
118 assembly compartment (cVAC), which does not involve the ER (**FIG 1**). Similarly  
119 contrasting staining patterns for Hrd1 and/or calnexin were observed in cells infected  
120 with wildtype versus *UL148*-null mutants of clinical HCMV strains Merlin and TR (**FIG**  
121 **S1**). Reciprocally, we restored a functional *UL148* at its native locus in the context of a  
122 BAC clone of HCMV strain AD169, which spontaneously lost most of the gene in the  
123 course of extensive genetic rearrangements and deletions that accumulated during  
124 serial passage in tissue culture. In cells infected with AD169 repaired for *UL148*, but  
125 not the *UL148*-null parental virus, the Hrd1 staining pattern showed obvious aggregation  
126 into globular structures (FIG S1).

127 As similar differences in Hrd1 staining are observed between wildtype and  
128 *UL148*-null infections of THP-1 macrophages, ARPE-19 epithelial cells and fibroblasts  
129 (**FIG 1, FIG S1**), *UL148*-dependent reorganization of ER markers occurs in multiple cell  
130 types. The calnexin staining pattern seen with four different primary clinical isolates  
131 from patient throat swabs likewise indicated punctate globular structures. These  
132 observations, taken together with the results from formal comparisons of wildtype  
133 versus *UL148*-null mutants of four different BAC-cloned HCMV strains (**FIG 1, FIG S1**),  
134 argue that *UL148* profoundly affects the ER during natural infection.

135 We measured the three-dimensional volume of *UL148*-dependent Hrd1  
136 structures from sixteen cells fixed at 96 hpi with strain TB40/E. On average, the  
137 structures occupied  $303.3 \mu\text{m}^3$  (SEM: +/- 24.8) out of a total cell volume of  $7657 \mu\text{m}^3$   
138 (SEM: +/- 651.0), as measured using a phalloidin-fluorophore conjugate to detect the

139 actin cytoskeleton (**FIG 1D-E**). Subtracting the volume of nuclei, as indicated by 4',6-  
140 diamidino-2-phenylindole [DAPI] (average nucleus: 1360  $\mu\text{m}^3$ , SEM: +/-129.4), we  
141 calculate that, on average, the structures occupy 5.2% of the cytosolic volume (SEM: +/-  
142 0.61%, range: 2.0% – 7.0%). Based on these findings, taken together with results  
143 comparing additional WT versus *UL148*-null mutant HCMV strains (**FIG S1**), we  
144 conclude that the UL148-dependent ER structures are a prominent feature of HCMV-  
145 infected cells.

146 UL148 substantially contributes to activation of the unfolded protein response  
147 (UPR) during HCMV infection (10), and co-purifies from infected cells with SEL1L (8),  
148 an adaptor subunit for the E3 ubiquitin ligase Hrd1, which plays crucial roles in ER-  
149 associated degradation (ERAD) of terminally misfolded glycoprotein substrates (13).  
150 Hence, the accumulation of Hrd1 and calnexin at unusual structures during wildtype but  
151 not *UL148*-null infection may suggest that structures form in response to defects in ER  
152 quality control (ERQC) caused by UL148. Under conditions of proteasome inhibition,  
153 overexpression of certain misfolded glycoproteins causes cellular factors involved in  
154 ERQC, such as calnexin, to compartmentalize from the rest of the ER, while other ER  
155 markers such as BiP (Grp78) or protein disulfide isomerase (PDI) remain largely  
156 unaltered (14-16).

157 To gain further insights into the nature of these peculiar ER structures, we set out  
158 to develop a more comprehensive understanding of their protein composition by  
159 comparing the localization of selected ER markers in cells fixed at 96 h post-infection  
160 (hpi) either with TB\_148<sup>HA</sup> (1), a derivative of HCMV strain TB40/E that expresses at the  
161 C-terminus of UL148 the nonapeptide epitope YPYDVPDYA from influenza A



162 hemagglutinin (HA), or with TB\_159<sup>HA</sup>, an isogenic control virus in which we replaced  
163 the *UL148* coding sequence with the UL148 homolog from rhesus cytomegalovirus,  
164 Rh159, likewise fused at its C-terminus to an HA-tag. We considered the TB\_159<sup>HA</sup>  
165 virus to be an appropriate control for the following reasons. Firstly, Rh159 and UL148  
166 exhibit ~30% identity at the amino acid level and both glycoproteins localize to the ER  
167 and block cell surface presentation immune cell activating ligands; UL148 retains CD58,  
168 a ligand for CD2, while Rh159 retains NKG2D ligands of the MIC- and ULBP families (1,  
169 9, 17). Secondly, Rh159 is expressed from TB\_159<sup>HA</sup> at comparable levels and with  
170 similar kinetics observed for UL148 from TB\_148<sup>HA</sup>, and the two viruses replicate  
171 indistinguishably in fibroblasts (**FIG 2**). Moreover, Rh159 does not appear to activate  
172 the UPR (10), and ERQC markers fail to coalesce into unusual structures during  
173 infection with TB\_159<sup>HA</sup> (**FIG 3**). Notably, ER structures likewise fail to occur in rhesus  
174 fibroblasts during infection with a recombinant rhesus cytomegalovirus (RhCMV)  
175 engineered to express an HA-tag fused at the C-terminus of Rh159 (**FIG S1**). This  
176 argues against the possibility that Rh159 requires the context of rhesus cells to  
177 redistribute ER markers in a manner analogous to what is seen for UL148 during HCMV  
178 infection, and instead suggests that UL148 and Rh159 authentically differ in their effects  
179 on the secretory pathway.

180 In cells infected with TB\_148<sup>HA</sup>, HA antibody staining indicated localization of  
181 UL148 to globular structures, as expected (1). Antibody signals during indirect confocal  
182 immunofluorescence detection of cellular ER resident proteins involved in ERQC,  
183 including calnexin, Hrd1, SEL1L, Herp, valosin containing protein (VCP, p97), and  
184 EDEM1, co-localized to a strong degree with signals from HA-tagged UL148 (**FIG 3-4**).

185 These results indicate that a number of ERQC factors coalesce with UL148 to form  
186 prominent globular structures in infected cells. In contrast, uniform ER staining patterns  
187 were observed with antibodies specific for PDI and calreticulin (CALR), indicating that  
188 these ER markers do not localize to the UL148 structures (**FIGS 3Q, 3S**). Intriguingly,  
189 antibody signals detecting reticulon 3 and ribophorin 1, which are markers for smooth  
190 ER and rough ER, respectively, each appreciably co-localized with UL148 (HA) signal at  
191 the induced structures (**FIGS 3K, 3M**), which indicates that the structures may involve  
192 both rough and smooth ER. LC3B failed to co-localize with the structures (**FIG S2**), as  
193 would be expected given that the virus inhibits macroautophagy at late times during  
194 infection (18, 19). Nevertheless, we obtained evidence suggesting the induced  
195 structures are enriched for a related mammalian ATG8 ortholog, GABARAP (**FIG 3O**).

196 In cells infected with TB\_159<sup>HA</sup>, all of the ER markers we examined showed  
197 uniform, reticular staining, as did the anti-HA signal detecting Rh159 (**FIG 3B, D, F, H,**  
198 **J, L, N, P, R, T**). EDEM1, in addition to showing reticular staining, also labeled puncta  
199 associated with the nucleus (**FIG 3J**), which may represent enriched levels of the  
200 protein at the rough ER membranes associated with the nuclear envelope, although we  
201 cannot exclude the possibility of spurious intranuclear staining. Nonetheless, the  
202 punctate nuclear signal for EDEM1 was much less pronounced in the TB\_148<sup>HA</sup>  
203 infected cells (**FIG 3I**). GABARAP antibodies stained the cVAC in TB\_159<sup>HA</sup> infected  
204 cells, but also showed a much weaker reticular signal that may indicate ER staining.  
205 Even though we took steps to block viral Fc receptors, which can cause rabbit  
206 antibodies to non-specifically label the cVAC (20), it is plausible that GABARAP  
207 antibody signal from the cVAC reflects incomplete blocking of viral Fc receptors. For

208 both viruses, antibodies specific for syntaxin-6 (STX6) and gH, as expected, stained the  
209 juxtannuclear cVAC structure (11, 12, 21), which was previously found to be altogether  
210 distinct from the UL148 staining pattern (1) (**FIG S2**).

211 To quantify the degree of co-localization with UL148, we calculated Pearson's  
212 correlation coefficients from a minimum of thirty TB\_148<sup>HA</sup> infected cells per staining  
213 condition, comparing the signal overlap for each ER marker to the HA signal from  
214 UL148. The correlation coefficients ( $r$ ) for EDEM1, Hrd1, reticulon-3 (RTN3), SEL1L  
215 and calnexin ranged from 0.8 to 0.72, which suggests that these proteins extensively  
216 co-localize with UL148 at 4 days post-infection (dpi) (**FIG 4**). Meanwhile, GABARAP,  
217 VCP, ribophorin-1 (RPN1), and Herp showed  $r$  values in the range of 0.54 to 0.51,  
218 indicating a moderate degree of co-localization with UL148. However, the ER markers  
219 CALR and PDI, and the TGN marker syntaxin-6, gave  $r$  values of close to zero, which  
220 confirms that these markers either do not co-localize with UL148 or show only a  
221 negligible degree of association with UL148 at the induced structures.

222 From these results, we conclude that the UL148-dependent ER structures are  
223 enriched for cellular markers associated with glycoprotein quality control. In this regard,  
224 the structures resemble the "ER quality control (ERQC) compartments" described by G.  
225 Lederkremer and colleagues (14, 15, 22). We further conclude that Rh159 cannot  
226 substitute for UL148 to redistribute ERQC markers.

227

### 228 **VCP and Hrd1 are recruited to incipient UL148 ER structures prior to calnexin.**

229 To determine whether there might be differences in the kinetics of recruitment of  
230 ERQC markers during formation of the ER structures, we examined a series of time

231 points from one to four days post-infection (dpi) with wild-type HCMV carrying HA-  
232 tagged UL148, staining for three different ERQC markers, calnexin, Hrd1, and VCP,  
233 alongside UL148 (HA). At 1 dpi the signal from UL148 was only faintly detected, as  
234 expected (1), while each of the ER markers was readily detected, providing a readout of  
235 their staining patterns prior to being substantially perturbed by UL148 (**FIG 5**). At 2 dpi,  
236 we detected robust anti-HA signal, indicating the presence of UL148. At this time point,  
237 UL148 exhibited intense signal at small globular puncta, which we interpret to represent  
238 incipient UL148 structures, as well as more diffuse staining of a reticular structure  
239 consistent with ER. Calnexin did not appreciably co-localize with the UL148 puncta until  
240 at least 3 dpi, and the structures were not readily visualized by calnexin staining until 4  
241 dpi (**FIG 5A**). In contrast, signals from Hrd1 and VCP staining were sufficient to mark  
242 the UL148 puncta by 2 dpi, which suggests that these markers co-localize with UL148  
243 at earlier points during the genesis of the ER structures. Notably, the appearance of  
244 Hrd1 at the structures prior to calnexin is consistent with our previous results showing  
245 that UL148 co-purifies from infected cells with SEL1L, an adaptor subunit for Hrd1 (8).  
246 These results imply that basal elements of the ERAD machinery, exemplified by Hrd1  
247 and VCP, may be recruited to UL148-induced ER structures prior to calnexin.

248

#### 249 **Visualization of UL148-induced ER structures by electron microscopy.**

250 To discern the ultrastructural appearance of the UL148 structures and to formally  
251 ascertain their relationship to the ER, we carried out transmission electron microscopy  
252 (TEM) imaging of wildtype (TB\_WT) and *UL148*-null (TB\_148<sub>STOP</sub>) infected fibroblasts at  
253 5 dpi. In high pressure frozen and freeze-substituted infected fibroblasts, cells with a

254 high density of viral nucleocapsids within the nucleus were selected for analysis, as this  
255 feature indicates late time points during infection when UL148 is abundantly expressed.  
256 The TEM results revealed prominent globular and oblong structures in the cytoplasm of  
257 wildtype virus infected fibroblasts, but not *UL148*-null infected controls (**FIGS 6-7**). The  
258 structures stand out for their high electron-density, which may reflect the abundance of  
259 ERQC proteins together with UL148 in these structures. Under higher magnification,  
260 these areas are characterized by accumulations of densely packed ruffled membranes  
261 and membranous material, which appear to be collapsed ER. Further, these membrane  
262 accumulations were associated with smooth and partially rough ER structures with  
263 seemingly enlarged cisternal space. Further, tomographic reconstruction of scanning  
264 transmission electron microscopy (STEM) data suggest that densely packed ER  
265 cisternae within the structures are interconnected and continuous in three-dimensional  
266 space (**FIG 8B-C, SI Movie S1**).

267

### 268 **UL148 accumulates in a detergent-insoluble form during infection.**

269 Disease-associated variants of certain cellular proteins, such as the A103E  
270 mutant of the calcium channel Orai1, and the E342K “Z” variant of alpha-1 antitrypsin (Z  
271 A1AT), localize to anomalous ER structures reminiscent of those we observe to depend  
272 on UL148 (16, 23-26). A103E Orai1 and Z A1AT are found to accumulate in detergent-  
273 insoluble forms within the ER or within ER membranes, respectively, which indicates  
274 aggregation or polymerization of these proteins, and suggests a mechanism for the  
275 formation of ER structures by the proteins (16, 23, 26, 27). We therefore set out to  
276 determine whether differences in solubility might correlate with the differing potentials

277 UL148 and Rh159 to cause ER reorganization and to activate the UPR (10). To  
278 address this question, we infected fibroblasts with TB\_148<sup>HA</sup> or TB\_159<sup>HA</sup> at MOI 1 and  
279 at various times post-infection prepared cell lysates in radioimmunoprecipitation assay  
280 (RIPA) buffer. After subjecting the lysates to high-speed centrifugation, we examined  
281 the relative levels of UL148 and Rh159 in the detergent-soluble supernatant and  
282 detergent-insoluble pellet fractions.

283 A substantial portion of UL148 was detected from the detergent-insoluble  
284 fractions at all time points tested (**FIG 9**). Furthermore, the percentage of UL148  
285 detected within the insoluble fraction increased over time. In contrast, Rh159 was found  
286 only in the detergent-soluble fraction. From these results, we conclude that UL148  
287 accumulates in a detergent insoluble form during infection, and that Rh159 does not do  
288 so. Because the relative mobility of the anti-HA immunoreactive band detected in  
289 soluble and insoluble fractions obtained from TB\_148<sup>HA</sup> infected cells showed a relative  
290 mobility of ~35 kD, which is indicative of the mature, endoH-sensitive glycoprotein (1),  
291 these findings suggest that UL148 may aggregate or polymerize within the ER.

292

### 293 **UL148 is sufficient to compartmentalize the ER.**

294 Our data thus far demonstrate that UL148 is necessary during infection to cause  
295 redistribution of cellular ER markers for glycoprotein quality control processes, such that  
296 substantial portion of the ERQC machinery appears to become sequestered away from  
297 the rest of the organelle into novel membranous structures. Because a number of viral  
298 proteins that remodel the ER during infection are sufficient to alter ER morphology when  
299 ectopically expressed [e.g. (28),(29), reviewed in (30)], we wondered whether UL148

300 expression is sufficient to induce ER structures akin to those seen during HCMV  
301 infection. Making use of existing “tet-on” ARPE-19 epithelial cells that inducibly express  
302 of either UL148 or Rh159, each carrying a C-terminal HA-tag (31), we induced  
303 transgene expression for 48 h and subsequently stained for various cellular markers for  
304 the ER, for ERQC as well as for LC3B and GABARAP, which are ATG8 family proteins  
305 that mark autophagosome membranes.

306 In cells expressing UL148 (i148<sup>HA</sup>), we observed that calnexin, Hrd1, EDEM1,  
307 and VCP co-localize with UL148 at prominent globular structures reminiscent of those  
308 observed during infection (**FIG 10**). The respective rough and smooth ER markers  
309 ribophorin 1 (RPN1) and reticulon 3 (RTN3), as well as the ATG8 proteins LC3B and  
310 GABARAP likewise co-localized to the UL148-induced structures. However, PDI and  
311 CALR each failed to substantially co-localize with UL148 at the structures (**FIG 10**), or at  
312 best showed only limited co-localization, consistent with our results from infected cells  
313 (**FIG 3-4**). Signals from antibodies specific for a KDEL motif important for ER retrieval  
314 of luminal ER residents, such as BiP, likewise showed only limited co-localization with  
315 UL148. These results suggest that large portions of the ER are not involved in the  
316 UL148 structures.

317 In cells expressing the UL148 homolog Rh159 (i159<sup>HA</sup>), we detected uniform  
318 cytoplasmic distribution of ER markers, as well as of HA-tagged Rh159, similar to what  
319 we observed during infection with the recombinant HCMV TB\_159<sup>HA</sup> (**FIG 3**).  
320 Furthermore, In this setting the staining patterns for the ATG8 family proteins LC3B and  
321 GABARAP failed to indicate any notable structures. Consistent with our previous study  
322 showing that UL148, but not Rh159, is sufficient to activate the UPR (10), we observed

323 accumulation of ATF4 and phosphorylated eIF2 $\alpha$  during induction of UL148 but not  
324 Rh159 (**FIG 11A**). Importantly, the intensity of HA signals detecting UL148 and Rh159  
325 indicated that both ER resident immunevasins accumulate at roughly comparable levels  
326 following dox induction. This argues against the possibility that gross differences in  
327 induced transgene expression might account for their differing effects on UPR activation  
328 and on the staining patterns for ER markers.

329 Pearson's correlation coefficient values were calculated to quantify the extent of  
330 colocalization between UL148 and various cellular markers: EDEM1, Hrd1, VCP,  
331 calnexin (CNX), RTN3, SEL1L, LC3B, and PDI (**FIG 11B**). The results quantitatively  
332 buttress the immunofluorescent staining data shown in FIG 10. From these results, we  
333 conclude that no other HCMV gene products are required for UL148 to cause ERQC  
334 factors to segregate into discrete compartments. Hence, UL148 is sufficient to cause  
335 large-scale reorganization of ERQC markers. Moreover, these findings suggest that  
336 reorganization of ER markers into discrete structures may be related to the propensity  
337 of UL148 to induce ER stress.

338 To determine whether UL148-dependent ER remodeling could be visualized in  
339 real-time using live cell imaging, we constructed "tet-on" lentiviral vectors that inducibly  
340 express either UL148 or Rh159 fused at their predicted C-terminal cytoplasmic tails to  
341 the enhanced green fluorescent protein (GFP) from *Aequorea victoria* (32). Following  
342 lentiviral transduction, puromycin-resistant ARPE-19 were isolated and subsequently  
343 subjected to fluorescence-activated cell sorting (FACS) to enrich for cells that  
344 expressed GFP signal following dox treatment. The resulting cell populations, which



345 inducibly express either UL148-GFP or Rh159-GFP, were designated i148<sup>GFP</sup> and  
346 i159<sup>GFP</sup>, respectively.

347 In live cell imaging studies, we observed that the GFP signal in dox-induced  
348 i148<sup>GFP</sup> cells first appeared in a reticular, largely uniform pattern, which was readily  
349 visible at 5 h post-induction. However, by 9 h post-induction punctate signals began to  
350 appear. These puncta were observed to traffic to sites of large-scale accumulation,  
351 where large fluorescent structures progressively increased in size up until the  
352 termination of the experiment at 19 h (**FIG 12A, SI Movie 2**). In contrast, i159<sup>GFP</sup> cells  
353 exhibited a largely diffuse, reticular GFP signal at all time points monitored subsequent  
354 to transgene induction (**FIG 12B, SI Movie 3**). Our live cell imaging results thus  
355 recapitulated the differences in the HA-staining patterns that we had observed between  
356 dox-induced i148<sup>HA</sup> and i159<sup>HA</sup> cells following fixation, as well as those between HA  
357 signals during HCMV infection with TB\_148<sup>HA</sup> and TB\_159<sup>HA</sup> (**FIGS 1, 3, 10, SI Fig S1**).

358

359 **UL148-GFP structures exhibit poor recovery of fluorescence after**  
360 **photobleaching.**

361 To determine whether the protein contents of the UL148 induced structures  
362 would exhibit decreased mobility compared to non-perturbed ER regions, we carried out  
363 fluorescence recovery after photobleaching (FRAP) studies. We photobleached regions  
364 of GFP signal in i148<sup>GFP</sup> or i159<sup>GFP</sup> ARPE-19 cells that had been induced for transgene  
365 expression for 24 h, and then monitored recovery of fluorescence over a 5 min time  
366 period. In Rh159-GFP expressing cells (i159<sup>GFP</sup>), fluorescence nearly recovered to pre-  
367 bleach levels within 3 min, and by 5 min fully recovered (**FIG 13D**). In contrast, when

368 we photobleached a prominent UL148-GFP structure, the GFP signal failed to  
369 appreciably recover fluorescence during the same 5 min time period (**FIG 13E**).  
370 Nonetheless, an area of reticular GFP signal in an i148<sup>GFP</sup> cell that presumably  
371 represents a region of the ER not involved in an anomalous structure, recovered  
372 fluorescent signal with kinetics similar to those observed during Rh159-GFP expression.  
373 These results suggested to us that UL148 structures do not exchange their contents as  
374 efficiently as unperturbed ER, or that at least the UL148-GFP within the structures is not  
375 able to be replaced rapidly with UL148-GFP fusion protein from other portions of the  
376 organelle.

377

### 378 **Ectopically-expressed UL148 is degraded by proteasomes and not by autophagy.**

379 The UL148 ER structures were found to be enriched with proteins such as Hrd1,  
380 SEL1L, EDEM, and VCP (**FIG 3-4, 10-11B**), which are posited to play key roles in  
381 ERAD, a process during which misfolded glycoproteins are recognized, processed, and  
382 dislocated across the ER membrane for degradation at cytosolic proteasomes.  
383 However, we also detected elements of the machinery for autophagy in close  
384 association with the UL148 structures. Namely, the mammalian ATG8 ortholog  
385 GABARAP co-localized with UL148 during infection (**FIG 3-4**), and both GABARAP and  
386 another ATG8 ortholog, LC3B, were found to co-localized with UL148 at the ER  
387 structures during ectopic expression of UL148 (**FIG 10, 11B**). Therefore, we wished to  
388 determine whether UL148 is degraded by the proteasome, as would be consistent with  
389 conventional ERAD, or by the lysosome, which would suggest a role for autophagy-

390 related processes, such as selective autophagy of the ER (33), in dispensing with  
391 UL148, and presumably, in resolving the ER perturbations.

392 As a first step, we conducted a live-cell imaging “washout” experiment in which  
393 i148<sup>GFP</sup> cells were induced for transgene expression for 24 h, after which the growth  
394 medium containing the transgene inducing agent (dox) was replaced with medium  
395 lacking dox. During a 22 h imaging period following dox-washout, we observed the  
396 structures to become progressively smaller as the reticular and punctate GFP signals  
397 gradually abated (**FIG 14A, SI Movie S7**). Because the results suggested that UL148-  
398 GFP structures could be resolved over time, we induced UL148-GFP in tet-on ARPE-19  
399 cells (i148<sup>gfp</sup>) for 24 h, washed out the inducing agent (dox), and then applied either  
400 epoxomicin (20  $\mu$ M), an irreversible inhibitor of the proteasome (34), or folimycin (115  
401 nM), a proton pump inhibitor that blocks autophagosome maturation and impedes the  
402 lysosome-dependent protein degradation (35, 36). Of the two inhibitors, only  
403 epoxomicin markedly stabilized UL148, as evidenced by the sustained Western blot  
404 signal for both GFP and UL148 in this condition relative to either DMSO carrier or  
405 folimycin treatments (**FIG 14B-C**). Despite that folimycin treatment had no obvious  
406 effect on UL148-GFP levels, the drug markedly increased the levels of LC3B-II, as  
407 would be expected with the lysosomal proton pump inhibitor. From these results, we  
408 conclude that ectopically expressed UL148 is primarily degraded via a proteasome-  
409 dependent mechanism.

410

411 **UL148 requires the integrated stress response to cause ER reorganization.**

412 We previously reported that UL148 triggers the UPR during ectopic expression,  
413 and that UL148 contributes to activation of the PKR-like ER kinase (PERK) and inositol  
414 requiring enzyme 1 (IRE1) during infection (10). Although we failed to find any effect of  
415 small interfering RNA (siRNA) or drug treatments targeting IRE1 on UL148-dependent  
416 ER remodeling (not shown), we did observe that siRNA directed at PERK caused  
417 UL148 to fail to form puncta or to co-localize with Hrd1 (not shown). Furthermore, the  
418 literature suggests that formation of ERQC compartments requires PERK (37). PERK  
419 responds to ER stress by activating the integrated stress response (ISR). In particular,  
420 PERK phosphorylates eIF2 $\alpha$  at Ser51 (eIF2 $\alpha$ -P), and the accumulation of eIF2 $\alpha$ -P  
421 causes global attenuation of mRNA translation whilst paradoxically stimulating  
422 translation of select mRNAs, such as those encoding ATF4 and CHOP, which play roles  
423 in adaptation to stress (38). Stress-regulated translation of such mRNAs involves small  
424 upstream open reading frames (uORFs) in their 5' untranslated regions that ordinarily  
425 suppress translation under basal conditions (39, 40).

426 To examine whether ER remodeling in response to UL148 requires the ISR, we  
427 turned to a well characterized small molecule inhibitor of stress-regulated translation,  
428 ISRIB (41-45). ISRIB is thought to act as a “molecular staple” that holds the guanine  
429 nucleotide exchange factor eIF2B in an active decameric configuration (43-46), such  
430 that eIF2B will continue to generate ternary complex (eIF2•GTP•Met-tRNA<sub>i</sub>) necessary  
431 for new cycles of translational initiation, despite the presence of phospho-eIF2 $\alpha$  (Ser51).  
432 Because PERK is the kinase that phosphorylates eIF2 $\alpha$  in response to ER stress (47,  
433 48), we also tested for effects of the PERK inhibitor GSK2606414 (49). Having  
434 confirmed that ISRIB and GSK260641 do not negatively impact UL148 expression

435 during dox-induction of UL148-GFP (**FIG 15A-B**), we treated i148<sup>GFP</sup> cells with 200 nM  
436 ISRIB, 1.1  $\mu$ M GSK260641, or DMSO vehicle control, and carried out live cell imaging  
437 during contemporaneous dox induction of UL148-GFP fusion protein.

438 Strikingly, ISRIB and GSK6060414 virtually abolished the formation of UL148  
439 puncta through 13 h post induction (dox addition), a time point at which the DMSO  
440 control condition showed abundant large structures (**FIG 15C-E, SI Movies 8-10**).  
441 Based on our previous findings (**FIGs 1-3, 6-7, 10**), we interpret the formation and  
442 subsequent large-scale aggregation of UL148-GFP puncta to faithfully indicate of ER  
443 reorganization in response to UL148. Therefore, these results suggested to us that  
444 pharmacological treatments that inhibit the ISR and PERK prevent UL148 induced  
445 remodeling of the ER, which further implies that ER remodeling in response to ER  
446 stress requires stress-regulated translation.

447 Since our results with ISRIB and GSK6060414 suggest that the ISR is required  
448 for UL148 mediated ER remodeling during ectopic expression of UL148, we next asked  
449 whether these pharmacological agents would prevent UL148-dependent ER remodeling  
450 in the physiologically authentic context of HCMV infection. However, our live cell  
451 imaging studies with ISRIB and GSK6060414 indicated that following a pronounced  
452 delay, UL148-GFP puncta nonetheless began to appear by ~19 h post treatment (**FIG**  
453 **15D-E, SI Movies 9-10**), which suggested that the pharmacological activity of the drugs  
454 might diminish over time. Therefore, in order to ensure that blockade of PERK and the  
455 ISR would be sustained over a four-day period that it takes for structures to fully form  
456 during HCMV infection, we replenished the drugs every 24 h by replacing the spent

457 media with media containing freshly reconstituted ISRIB, GSK6060414, or DMSO  
458 vehicle control.

459         At 4 days postinfection, ER structures were virtually ablated in the ISRIB and  
460 GSK2606414 treatment conditions (**FIG 16A**). To quantify these effects, we obtained Z-  
461 stacks from a minimum of 30 cells per treatment condition and used Imaris 3D image  
462 analysis software to calculate the percentage of Hrd1 signal that coalesced into discrete  
463 structures during infection. The results indicated highly significant differences between  
464 the DMSO carrier alone setting compared to treatments with either GSK2606414 or  
465 ISRIB (**FIG 16B**). In the DMSO control condition, on average, 10% of the Hrd1 signal  
466 was found to be associated with the UL148 structures (arithmetic mean; range 5.8% –  
467 17.6%), as indicated by structures delimited by HA signal. In the presence of ISRIB or  
468 GSK2606414, however, these values were reduced to 2.8% (range: 0.69% – 7.1%) and  
469 3.6% (range: 0.8%-6.5%), respectively. Reassuringly, roughly equivalent levels of  
470 UL148 were detected in Western blot analyses of protein extracts from drug treated and  
471 DMSO control conditions. Therefore, differences in UL148 expression are unlikely to  
472 explain the observed failure of UL148 and Hrd1 to coalesce into structures during  
473 inhibition of either the ISR or PERK. Meanwhile, ISRIB and GSK2606414 treatments  
474 both led to reduced levels of ATF4 accumulation, while the PERK inhibitor alone was  
475 able to reduce the levels phospho-eIF2 $\alpha$  (Ser51), as indicated by a phospho-specific  
476 antibody. Therefore, each of the drugs caused their expected effects on the PERK /  
477 eIF2 $\alpha$  / ATF4 axis (**FIG 16C-D**).

478         A modest reduction in the levels of the viral envelope glycoprotein B (gB) was  
479 observed during treatments with ISRIB or GSK2606414. This may suggest that the ISR

480 is required for optimal expression of the certain viral envelope glycoproteins. Even  
481 viruses lacking *UL148* cause high levels of ATF4 accumulation at late times during  
482 infection, which is when viral late gene products, such a gB, are expressed at their  
483 highest levels (10). Hence, the activity of PERK, and/or ISR regulated translation may  
484 be required for optimal expression of viral envelope glycoproteins. Regardless, the  
485 PERK inhibitor and ISRIB each prevented the appearance of discrete UL148 ER  
486 structures while failing to substantially affect UL148 expression. Therefore, the effects  
487 of the two inhibitors on UL148-dependent ER reorganization were fully consistent with  
488 those seen during ectopic expression of the immunevasin. Taken together, our findings  
489 argue that the ISR is required for UL148 to cause remodeling of the organelle.

## 490 **DISCUSSION**

491           The ER structures that we have identified are noteworthy in several regards.  
492 Firstly, this example of virally-induced ER remodeling is wholly dependent on a single  
493 viral gene product, UL148. Of course, there are other examples of individual viral gene  
494 products that are necessary to grossly perturb ER morphology during infection which  
495 are also found to be sufficient to induce such perturbations [e.g., (28, 29, 50, 51)].  
496 Nonetheless, the ER structures caused by UL148 are— to the best of our knowledge, a  
497 hitherto undescribed ultrastructural characteristic of the HCMV infected cell, which is  
498 surprising given their size, scale, and prominence. Indeed, the average volume of the  
499 structures at 96 h postinfection amounts to roughly 60% of the size of the nucleus of an  
500 uninfected human fibroblast [ $\sim 500 \mu\text{m}^3$ , (52)]. Although UL148 expression is  
501 accompanied by UPR activation, ER reorganization occurs without killing the host cell,  
502 even in the setting of ectopic expression when viral functions that inhibit programmed  
503 cell death are absent. Nor does UL148 affect the yield of infectious virus during  
504 replication in fibroblasts, since *UL148*-null mutant viruses replicate indistinguishably  
505 from wildtype parental virus in this cell type (1, 8). As with all enveloped viruses, HCMV  
506 requires the host cell secretory pathway to fold and process enormous quantities of viral  
507 envelope glycoproteins that endow progeny virions with the molecular machinery for  
508 infectivity. It is intriguing to consider how the infected cell tolerates spatial  
509 reorganization of ER membranes and the associated glycoprotein quality control  
510 machinery without impacting the production of infectious progeny virions.

511           Furthermore, certain aspects of ER reorganization invoked by UL148 may be  
512 novel to cell biology. In particular, the densely packed collapsed ER in close



513 association with varicosities that we observe to depend on UL148 during infection  
514 appear to differ from the ER structures induced by other ER perturbagens. For  
515 instance, a hereditary form of childhood cirrhosis caused by the Z allele of the alpha-1-  
516 antitrypsin (Z-A1AT) gene (*SERPINA*) is characterized by polymerization of Z-A1AT  
517 within the ER (25), leading to its accumulation in membrane-delimited inclusions (25,  
518 26, 53). However, Z-A1AT inclusions are not observed to associate with regions of  
519 collapsed ER, nor does Z-A1AT suffice to activate the UPR, even though its expression  
520 sensitizes cells to other triggers of ER stress (26, 54).

521 HCMV encodes at least one other ER-resident immunevasin that activates the  
522 UPR, US11 (55). UL148 binds the NK-cell and T-cell costimulatory ligand CD58 to  
523 prevent its transport to the cell surface while US11 targets the heavy chain of class I  
524 major histocompatibility complex (MHC) for ER-associated degradation (56, 57). UL148  
525 causes CD58 to accumulate as an immature glycoform, presumably within the ER, but  
526 does not lead to any obvious decrease in its overall abundance (9). Albeit that  
527 intracellular forms of CD58 appear to be refractory to detection by standard indirect  
528 immunofluorescence protocols (not shown), it seems reasonable to hypothesize that  
529 UL148 sequesters CD58 into the unusual ER structures that it induces. Moreover, our  
530 detergent solubility results suggest that UL148 may form aggregates or polymers in the  
531 course of preventing CD58 presentation at the cell surface (FIG 9). It is worth noting  
532 that UL148, an immunevasin targeting CD58, induces dramatic morphologic  
533 rearrangements of the ER, while another HCMV immunevasin, US11, targeting MHC  
534 class I for degradation evidently does not do so, even though both trigger ER stress.  
535 Nonetheless, it seems unlikely that retention of CD58 would be required for ER

536 reorganization. In fact, the capacity of UL148 to retain CD58 may be functionally  
537 separable from its peculiar effects on the morphology and organization of the ER.

538         Despite that the relationship between the mechanism for CD58 retention and the  
539 formation of UL148-dependent ER structures remains unresolved, our findings may  
540 suggest a mechanism to explain the influence of UL148 on the tropism of the virus for  
541 epithelial cells. These effects, exemplified by a ~100-fold replication advantage of  
542 *UL148*-null viruses during infection of epithelial cells, correlate with decreased  
543 expression of glycoprotein O (gO), a viral envelope glycoprotein, both in virions and in  
544 infected cells (1). We previously reported that gO behaves as a constitutive ERAD  
545 substrate during infection and that immature, newly synthesized forms of gO show  
546 enhanced stability in the presence of UL148 (8). We now show that UL148 causes  
547 large-scale sequestration of cellular factors important for ERAD, such as the ER  
548 mannosidase EDEM1 and the E3 ubiquitin ligase SEL1L/Hrd1, into large membranous  
549 structures. Moreover, the reticular ER, as indicated by the staining patterns of  
550 antibodies specific for calreticulin, PDI, and the KDEL motif, appears to remain largely  
551 intact following UL148-induced ER reorganization (FIGs 3, 10). Since these  
552 observations indicate that UL148 depletes ERAD factors from the ER during the  
553 formation of the unusual structures, regions of ER not drawn into the structures might  
554 be expected to offer a more permissive folding environment for polypeptides, such as  
555 gO, which either fold slowly or inefficiently assemble into multiprotein complexes.

556         Based on these observations, one might hypothesize that UL148 alters ER  
557 proteostasis by physically dislocating (or sequestering) key elements of the “mannose  
558 removal time clock” system that marks poorly folding glycoproteins for destruction via

559 ERAD (58, 59). Because gO is both the defining subunit of the heterotrimeric gH/gL/gO  
560 envelope glycoprotein complex that governs HCMV entry and cell tropism (5-7, 60, 61),  
561 and a constitutive ERAD substrate (1, 8), the hypothesis that ER reorganization is  
562 required for the effects of UL148 on HCMV cell tropism does not seem unreasonable.  
563 Going forward, it will be crucial to determine whether classical ERAD substrates, such  
564 as the null Hong Kong variant of alpha-1-antitrypsin (62, 63) or ribophorin-332 (64, 65),  
565 are stabilized during UL148 expression, as would be predicted if UL148 shifts ER  
566 proteostasis to negatively modulate ERAD.

567         In addition to having found that factors involved in proteasomal ERAD, such as  
568 Hrd1 and EDEM1, are enriched at the UL148 structures, we observed that GABARAP,  
569 a mammalian ortholog of yeast ATG8, localizes to the UL148 ER structures during  
570 infection, and that another ATG8 ortholog, LC3B, and GABARAP both associate with  
571 the structures during ectopic expression of UL148. This may suggest roles for  
572 autophagy-related pathways in UL148-dependent reorganization of the organelle.  
573 Since our results indicate that UL148 is degraded by a proteasome-dependent pathway  
574 and not by lysosomes, it seems unlikely that selective autophagy of the ER is directly  
575 involved in recycling or degrading these ER structures. Nonetheless, ATG8 family  
576 proteins may contribute to formation of large structures, vis-a-vis the trafficking of  
577 UL148-GFP puncta observed during our live cell imaging studies (FIGs 12, 15, Movies  
578 S2, S8). The literature indicates that misfolded proteins traffic in a microtubule (MT)-  
579 dependent manner to form pericentriolar structures termed aggresomes, which in the  
580 case of ERAD substrates such as the  $\Delta$ F508 mutant of the cystic fibrosis  
581 transmembrane conductance regulator (CFTR), contain deglycosylated protein that

582 presumably has already undergone dislocation from the ER (66, 67). ATG8 family  
583 proteins such as LC3B and GABARAP not only play roles in degradation of substrates  
584 via macroautophagy, but also bind MTs and recruit machinery for MT-dependent  
585 transport of cargos (68-70). Therefore, GABARAP and LC3B may be important for the  
586 recruitment of cellular machinery that transports perturbed ER cargoes to sites of large-  
587 scale accumulation.

588         Although our results argue that the ISR is required for ER reorganization during  
589 UL148 expression, precisely how UL148 triggers ER stress remains unknown. UL148  
590 has been found to co-purify from cells with SEL1L, a component of the ERAD  
591 machinery. Thus, it seems plausible that UL148 may inhibit the Hrd1/SEL1L complex,  
592 which would cause the buildup of unfolded proteins and thus trigger the UPR. However,  
593 inhibition of ERAD in and of itself seems unlikely to account for the formation of ER  
594 structures. Another non-mutually exclusive possibility is that UL148 multimerizes or  
595 aggregates in a manner that constricts the ER lumen. For instance, the assembly of  
596 UL148 molecules on opposite sides of the ER lumen might constrict the organelle in a  
597 manner consistent with the collapsed regions of ER observed in our EM results (FIGs 6,  
598 8).

599         Additional work will certainly be needed to decipher the molecular mechanisms  
600 by which UL148 causes reorganization of the ER, and to determine its physiological  
601 relevance to viral biology. Nonetheless, we have shown that UL148, when fused to a  
602 fluorescent protein (FP), suffices both to trigger and to indicate the presence of a  
603 functional ISR (FIGs 15-16). Hence, UL148-FP fusions may prove useful in high  
604 throughput chemical-genetic screens to identify novel small molecule inhibitors of the

605 ISR as well as to identify cellular genes involved in stress-dependent remodeling of the  
606 ER. Interestingly, the two pharmacological agents that block UL148-dependent ER  
607 remodeling, ISRIB and GSK2606414, are known to prevent the formation of stress  
608 granules (SGs) (42, 71). SGs are comprised of condensed aggregates of protein and  
609 RNA which occur due to stalled mRNA translation in the context of disease states, such  
610 as amyotrophic lateral sclerosis (72), as well as during treatments with toxic agents  
611 such as arsenite (42, 71). It is fascinating to consider that mechanistic parallels exist  
612 between the formation of SGs and the UL148-dependent reorganization of the ER.  
613 Moreover, given the broad importance macromolecular aggregation in pathological  
614 conditions such as neurodegenerative diseases (73), certain of which also involve  
615 defects in ER proteostasis and aberrant activation of the UPR, UL148 may hold promise  
616 as tool to discover new agents to ameliorate disease.  
617

618 **MATERIALS AND METHODS.**

619

620 **Cells and virus.**

621 hTERT-immortalized human foreskin fibroblasts (8), derived from ATCC HFF-1 cells  
622 (SCRC-1041) were maintained in Dulbecco's modified Eagle's medium supplemented  
623 with 5%-10% newborn calf serum (Millipore Sigma) and antibiotics (complete DMEM)  
624 exactly as described previously (8). i148<sup>HA</sup> and i159<sup>HA</sup> ARPE-19 epithelial cells (10),  
625 which upon treatment with 100 ng/mL doxycycline, express HA-tagged UL148 or  
626 Rh159, respectively, were likewise maintained in complete DMEM. For live cell imaging  
627 studies, i148<sup>HA</sup> and i159<sup>HA</sup> ARPE-19 were maintained in Opti-MEM (Thermo Fisher)  
628 supplemented with 3% certified tet-approved fetal bovine serum (FBS), 20 µg/mL  
629 gentamicin sulfate, 1 µg/mL puromycin HCl and 10 µg/mL ciprofloxacin HCl.  
630 Telomerase-immortalized rhesus fibroblasts (74) were a kind gift of Peter A. Barry, and  
631 were maintained in complete DMEM. The acute monocytic leukemia cell line THP-1  
632 (TIB-202) was obtained from ATCC (Manassas, VA) and maintained as suspension  
633 cultures in RPMI 1640 medium supplemented with 10% FBS (Millipore Sigma) and  
634 antibiotics (10 µg/mL ciprofloxacin and 25 µg/mL gentamicin). THP-1 were  
635 differentiated into adherent macrophages by incubating for 48 h in the presence of 100  
636 nM 2-O-tetradecanoylphorbol 13-acetate (Millipore Sigma), and subsequently infected  
637 with the indicated viruses at an MOI of 5 TCID<sub>50</sub>/cell.

638 Infectious bacterial artificial chromosome (BAC) clones of the following HCMV  
639 strains were used for this study: TB40/E (also known as TB40-BAC4 or TB<sub>WT</sub>) (75)  
640 as well as its derivatives TB<sub>148</sub><sup>HA</sup> and TB<sub>148</sub><sup>STOP</sup>, which were used in our previous

641 studies (1, 8, 10); TR (TR*gfp*) (76, 77); Merlin repaired for *UL128* and *RL13* harboring  
642 *tetO* sequences upstream of *UL131* (pAL1393) (78); AD169 repaired for *UL131*  
643 (AD\_r131)(1, 79) and AD\_r131\_148<sup>HA</sup>, a derivative of AD\_r131 that carries a full length  
644 UL148 (from strain TB40/E) tagged with an HA-epitope at the original *UL148* locus (8).  
645 An infectious BAC clone of rhesus CMV (RhCMV) strain 68-1 (80) and a derivative that  
646 expresses an HA-tagged Rh159 (details below) were also used for certain experiments.  
647 The methods used for reconstitution of HCMV from purified BAC DNA, cultivation of  
648 virus and preparation of stocks, including ultracentrifugation through sorbitol cushions  
649 and determination of infectious titers by tissue culture infectious dose 50 (TCID<sub>50</sub>) assay  
650 have been described elsewhere (8, 10).

651

## 652 **Construction of recombinant viruses and new plasmids for the study.**

653 New recombinant viruses for this study were derived from BAC-cloned HCMV  
654 and RhCMVs using *en passant* mutagenesis in GS1783 *E. coli*, a strain K12 derivative  
655 that expresses the homing endonuclease I-SceI upon treatment with L-(+)-arabinose  
656 (81, 82). Recombinant BACs were confirmed by Sanger DNA sequencing of the  
657 modified regions, which was performed by Genewiz, Inc. (Piscataway, NJ) (not shown).  
658 Oligonucleotide primers for construction of recombinant viruses and plasmids were  
659 custom synthesized by Integrated DNA Technologies (Coralville, IA); sequences are  
660 provided in **Table S1**. Type II restriction endonucleases, T4 DNA ligase, and Gibson  
661 assembly reagents (NEB HiFi Assembly Master Mix) for generation of recombinant  
662 DNAs and for routine molecular cloning and subcloning procedures were obtained from

663 New England Biolabs (Ipswich, MA). KOD Hot Start DNA polymerase (EMD Millipore)  
664 was used for all PCR reactions.

665 To construct TB\_159<sup>HA</sup>, a strain TB40/E derivative in which the UL148 open  
666 reading frame is replaced by Rh159 we carried out the following steps. Primers  
667 Rh159\_Fw and Rh159\_HA\_Rv were used to amplify and HA-tag the *Rh159* ORF from  
668 pcDNA3.1+\_Rh159\_IRES\_GFP (a gift from Klaus Früh, OHSU). The PCR product was  
669 inserted into EcoRV-digested pEF1 $\alpha$  using Gibson assembly. A PCR product  
670 containing an ISce-I excisable kanamycin cassette was amplified from TB\_148<sup>HA</sup>\_ISce-  
671 *Kan* integrate BAC (1) using primers PpulSceKanGibs\_Fw and PpulSceKanGibs\_Rv  
672 and Gibson-assembled into PpuMI-digested pEF1 $\alpha$ \_Rh159 plasmid to yield plasmid  
673 pEF1 $\alpha$ \_Rh159\_ISceKan. Primers Rh159\_Fw\_recomb and Rh159\_Rv\_recomb were  
674 used to generate a PCR product from template plasmid pEF1 $\alpha$ \_Rh159\_ISceKan. The  
675 PCR product was electroporated into GS1783 E. coli harboring the TB\_148<sup>HA</sup> BAC, and  
676 Kan<sup>r</sup> colonies harboring TB\_ $\Delta$ 148\_Rh159\_ISceKan integrate BACs were isolated on  
677 Luria-Bertiani agar plates. Bacterial colonies representing kanamycin resistant  
678 integrates were obtained and were subsequently resolved to ‘scarlessly’ remove the  
679 positive selection marker by standard *en passant* protocols (81, 82) to yield  
680 TB\_ $\Delta$ 148\_Rh159<sup>HA</sup>, which we abbreviate herein as TB\_159<sup>HA</sup>. TB\_159<sup>HA</sup> was  
681 sequence-confirmed using primers TB\_Rh159HA\_seq\_Fw and REV  
682 TB\_Rh159HA\_seq. Similar strategies were used to modify the RhCMV 68-1 BAC (80)  
683 to incorporate sequences encoding an HA-epitope immediately before the stop codon of  
684 *Rh159*. An *en passant* strategy in which a shuttle plasmid carrying *I-SceI-Kan<sup>r</sup>*  
685 disrupted by in-frame nonsense codons was used insert premature nonsense codons in



686 the *UL148* CDS in the context of HCMV strains Merlin (pAL1393) and TR (TR*gfp*), and  
687 was applied as described previously for generating TB\_148<sub>STOP</sub>, the UL148<sub>STOP</sub> mutant  
688 of strain TB40/E (8).

689 To construct “tet-on” lentivirus vector plasmids containing UL148 fused to GFP,  
690 we used primers Gibs\_eGFP\_Rv and 148\_eGFP\_Fw to amplify the GFP gene from a  
691 dsDNA gBlock, EGFP-P2A-3XHA, synthesized by Integrated DNA Technologies  
692 (Coralville, IA), which was a gift of Matthew D. Woolard (LSU Health Sciences Center,  
693 Shreveport, LA). In a separate PCR, the *UL148* gene was amplified from plasmid  
694 pcDNA3.1-UL148<sup>HA</sup> (10) using primers Gib\_148\_Fw and 148\_noStopRv. The two  
695 products were assembled, using Gibson Assembly, together with EcoRV opened  
696 pcDNA3.1(+) (Invitrogen) to produce pcDNA3.1-UL148-GFP. After confirming the  
697 absence of spurious mutations by Sanger DNA sequencing (Genewiz, not shown), the  
698 *UL148-GFP* cassette from pcDNA3.1-UL148-GFP was released by EcoRI and NotI  
699 digestion and ligated into pOUPc turboRFP-link plasmid which had been linearized  
700 using the same restriction sites. pOUPc turboRFP-link is a derivative of lentiviral vector  
701 pOUPc (10) that was constructed by reinsertion of turboRFP (tRFP). Briefly, tRFP was  
702 amplified from the original pOUPc-turboRFP using primer pair tRFP linker Fw and tRFP  
703 linker Rv and then reinserted by Gibson Assembly with pOUPc turboRFP that had been  
704 double-digested using EcoRI and Not I in order to linearize the vector and remove the  
705 *turboRFP* (RFP) sequence.

706 To express Rh159 fused to eGFP, primers Gibs\_eGFP\_Rv and 159\_eGFP\_Fw  
707 were used to amplify the GFP gene from EGFP-P2A-3XHA, and in a separate PCR  
708 reaction, primers Gibs\_159\_Fw and 159\_noStop\_Rv Rh159 were used to amplify

709 *Rh159* from pcDNA3.1-Rh159<sup>HA</sup> (10). The latter two PCR products were assembled  
710 together with EcoRV linearized pcDNA3.1(+) using Gibson Assembly, resulting in  
711 plasmid pcDNA3.1-Rh159. The latter plasmid was used as template in a PCR reaction  
712 with primers Gibs\_Age\_159\_Fw and Gibs\_Mlu\_GFP\_Rv. The resulting PCR product  
713 was Gibson assembled into the lentiviral vector pOUPc (10) which had been double-  
714 digested with Mlu I and Age I.

715

#### 716 **Drug treatments.**

717 The PERK inhibitor, GSK2606414 (49), doxycycline hyclate, and folimycin were  
718 obtained from MilliporeSigma (Burlington, MA). ISRIB (41-45) was obtained from  
719 MilliporeSigma or APExBio (Boston, MA) and epoxomicin was procured Selleck  
720 Chemicals (Houston, TX). ISRIB was dissolved in DMSO to make a 10,000× stock  
721 solution (2 mM) and used at a final working concentration of 200 nM. GSK2606414 was  
722 dissolved in DMSO to make a 10,000× stock solution (11 mM) and used at a final  
723 working concentration of 1.1 μM. Folimycin was prepared as a 1000× (115.46 μM)  
724 stock solution in DMSO and used at 115 nM final. Epoxomicin was prepared as a 100×  
725 (2 mM) stock solution in DMSO and used at a final concentration of 20 μM.

726

727 **Confocal microscopy and live-cell imaging.** Confocal indirect immunofluorescence  
728 microscopy imaging on fixed cells was carried out using Leica TCS SP5 Spectral  
729 Confocal Microscope (Leica Microsystems, Heidelberg, Germany) using a Leica HCX  
730 PL APO CS 63x/1.4-0.6NA objective under oil immersion, except for the image shown  
731 in Figure 1C, which was captured on a Nikon SIM-E and A1R confocal microscopy

732 system (Nikon Instruments, Melville, NY) using a Nikon SR Apo TIRF 100x/1.49NA  
733 objective under oil immersion. Images for different fluorophore channels were acquired  
734 using sequential scanning. Direct immunofluorescence live cell imaging data were  
735 collected using the Nikon SIM-E microscope using a Nikon Apo 60x/1.40NA DIC  
736 objective.

737         The 3D projections shown in FIGs 1D and 16A were generated from Z-stacks  
738 captured on the Nikon SIM-E / A1R microscope using a Nikon SR Apo TIRF  
739 100x/1.49NA objective. For FIG 1D, the 3D projection was generated using NIS-  
740 Elements AR Analysis 4.60.00 (64-bit) software (Nikon). For FIG 16A, 3D projections  
741 were generated by Imaris x64 9.3.0 software (Bitplane, Inc.) in maximum intensity  
742 projection (MIP) mode.

743         For fixed cell imaging experiments other than those shown in Fig S1D, cells were  
744 seeded on 12 mm circular, No. 1 thickness microscope cover glass (200121; Azer  
745 Scientific, Morgantown, PA). At the indicated times post-treatment and or post-infection,  
746 cells were washed with phosphate buffered saline (PBS) [137 mM NaCl, 2.7 mM KCl, 10  
747 mM Na<sub>2</sub>HPO<sub>4</sub>, and 1.8 mM KH<sub>2</sub>PO<sub>4</sub>, pH 7.4]; fixed for 15 min at room temperature in PBS  
748 containing 4% (wt/vol) paraformaldehyde (Fisher Scientific, Waltham, MA), washed in  
749 PBS, permeabilized for 10 min using 0.1% Triton X-100 (in PBS), subsequently washed  
750 again in PBS, and then blocked for 45 min at 37 °C in PBS containing 5% (vol/vol) normal  
751 goat serum (Rockland Immunochemicals, Limerick, PA). Cells were then washed three  
752 times in PBS followed by incubation in 1% Human Fc Block (BD Biosciences, San Jose,  
753 CA) in PBS, for additional 45 min at 37 °C. Cells were then incubated in the presence of  
754 primary antibodies for 1 h at 37 °C or 4 °C overnight, and then washed three times with

755 PBS containing 0.1% Tween-20 (PBST) for 5 min per wash. Alexa Fluor-labeled goat  
756 polyclonal secondary antibodies (all from ThermoFisher Invitrogen, Waltham, MA, see  
757 **Table S2**) were used for secondary detection. The slides were then mounted using  
758 Prolong Gold anti-fade reagent containing DAPI (ThermoFisher) and placed under a  
759 Leica TCS SP5 confocal microscope for image acquisition using a Leica 63× oil  
760 immersion objective lens (Leica Microsystems, Buffalo Grove, IL).

761 For indirect immunofluorescence staining results of primary clinical isolates (SI Fig  
762 S1D), four clinical HCMV isolates obtained by routine testing of throat swabs from patients  
763 of the Ulm University Medical Center were provided by the diagnostic laboratory of the  
764 Institute of Virology in Ulm. Sample material was applied to human fibroblasts and  
765 incubated for several days until HCMV-positive cells could be detected. Infected cells  
766 were then seeded together with uninfected fibroblasts, incubated for up to 5 days until  
767 plaques were formed and processed for indirect immunofluorescence staining. ERQC  
768 compartments were detected by staining for calnexin (CNX, E10; Santa Cruz  
769 Biotechnology, mouse, 1:50 dilution), the cVAC was detected by staining for HCMV  
770 pUL71 (rabbit, 1:500). Secondary antibody used for detection of CNX was Alexa Fluor  
771 555 labeled goat anti-mouse IgG (1:1000) and for pUL71 detection, Alexa Fluor 488  
772 conjugated goat anti-rabbit IgG (1:1000). Confocal images were acquired using the 63×  
773 objective of a Zeiss Observer Z1 fluorescence microscope equipped with Apotome and  
774 Zen software 2.3 (Carl Zeiss Microscopy GmbH, Jena, Germany).

775

776 **FRAP.** FRAP studies were carried out on using live ARPE-19 cells from the i148<sup>GFP</sup>  
777 and i159<sup>GFP</sup> populations as follows. Cells were seeded as above for live-cell imaging,

778 induced for transgene expression using dox (100 ng) for 24 h, and then placed on an  
779 incubated sample stage of a Nikon A1R SIM-E imaging system equipped with an SR  
780 Apo TIRF 100x/1.49NA objective (Nikon). Three rectangular regions in image fields  
781 were defined for measurement of (i) background signal, and of two regions with  
782 comparable initial GFP signals, (ii) one designated as a control region (no  
783 photobleaching) and another for (iii) photobleaching and recovery of signal after  
784 photobleaching. Photobleaching of selected regions was carried out for 20 s using 405  
785 nm laser light from a LU-N4 laser fiber (Nikon) [power at source: 15 mW, power at  
786 objective: 8 mW]. Images and signal intensity measurements were captured every 2 s  
787 at a rate of 1 frame per s (488 nm excitation, FITC channel) starting immediately before  
788 photobleaching ( $t=1$ ), and from  $t=20$  s to  $t=320$  s after.

789

790 **Electron microscopy.** Procedures to prepare samples for transmission electron  
791 microscopy (TEM) included high-pressure freezing (HPF), freeze substitution, and Epon  
792 embedding, which were carried out as described previously (83). Briefly, human  
793 fibroblasts were seeded in  $\mu$ -Slides (Ibidi GmbH, Martinsried, Germany) containing  
794 carbon-coated sapphire discs (Engineering Office M. Wohlwend GmbH) 1 day prior to  
795 infection at 80 to 90% confluence. Cells were infected with virus overnight at MOI 1.  
796 Medium containing viral inocula was replaced with fresh medium the next day. Infected  
797 cells on sapphire discs were fixed by using HPF with a Compact 01 high-pressure freezer  
798 (Engineering Office M. Wohlwend GmbH, Sennwald, Switzerland) at 5 dpi. Thereafter,  
799 cells on sapphire discs were processed by freeze-substitution and subsequently  
800 embedded in Epon (Fluka, Buchs, Switzerland). Ultrathin sections of the Epon-embedded

801 cells were cut with an ultramicrotome (Ultracut UCT; Leica Microsystems, Wetzlar,  
802 Germany) and placed on Formvar-coated single-slot grids (Plano GmbH, Wetzlar,  
803 Germany). Grids were examined in a Jeol JEM-1400 (Jeol Ltd., Tokyo, Japan)  
804 transmission electron microscope equipped with a charge-coupled-device (CCD) camera  
805 at an acceleration voltage of 120 kV. Fixation and embedding of infected cells for  
806 scanning transmission electron microscopy (STEM) tomography was the same as  
807 described for TEM. Additional sample preparation steps were conducted as described  
808 previously (84, 85). Tomogram acquisition was conducted on a STEM Jeol JEM-2100F  
809 with an acceleration voltage of 200 kV. Tilt series were acquired from 600 nm thin  
810 sections from +72° to -72° with a 1.5° increment using the bright field detector. Image  
811 series were reconstructed to tomograms by weighted back projection with the IMOD  
812 software package (86). 3D visualization of the membrane structures was performed using  
813 Avizo lite software (Visualization Science Group, Burlington, MA, USA) by threshold  
814 segmentation.

815

816 **Western blotting.** Western blotting procedures, including primary and secondary  
817 antibodies used for detection of HA tag, UL148, ATF4, eIF2 $\alpha$ , P-eIF2 $\alpha$  (Ser51), the  
818 HCMV viral nuclear antigen IE1, and the conditions used for detection of Ser51  
819 phosphorylated eIF2 $\alpha$ , were carried out as described previously (8, 10). Additional  
820 antibodies used in this study were mouse anti-GAPDH (Cat. No. 60004-1, Proteintech,  
821 Rosemont, IL.), mouse anti-gB clone 27-180 (87) (a generous gift of William J. Britt),  
822 and anti-GFP (D5.1) XP<sup>®</sup> Rabbit mAb #2956 (Cell Signaling Technology, Danvers, MA).

823

824 **Solubility analyses.**  $2.0 \times 10^5$  human fibroblasts were infected at an MOI of 1 TCID<sub>50</sub>  
825 per cell with TB\_148<sup>HA</sup> or TB\_159<sup>HA</sup>. The following day, cells were washed twice with  
826 PBS to remove viral inoculum and replenished with DMEM containing 5% newborn calf  
827 serum. At the indicated times post-infection, cells were washed once with PBS and  
828 lysed by direct addition of 100  $\mu$ L RIPA buffer [25 mM HEPES (pH 7.5), 400 mM NaCl,  
829 0.1% SDS, 0.5% sodium deoxycholate, 1% NP-40, supplemented with 1 $\times$  protease  
830 inhibitor cocktail (ApexBio)]. Lysates were collected and rotated at 4°C for 1 h.  
831 Insoluble material was pelleted by centrifugation (21,000  $\times$  *g*, 35 min). Supernatants  
832 containing soluble material were transferred to a fresh microfuge tube, and 33  $\mu$ L of 4 $\times$   
833 Laemmli sample buffer [200 mM Tris (pH 6.8), 8% SDS, 40% glycerol, 0.08%  
834 bromophenol blue] was added to bring final volume to 133  $\mu$ L. The pellet was disrupted  
835 in 133  $\mu$ L of 1X Laemmli buffer prepared by diluting 4 $\times$  Laemmli buffer in RIPA buffer.  
836 Samples were reduced by addition of beta-mercaptoethanol (5% final, v/v) and boiled at  
837 90°C for 10 min. 40  $\mu$ L of each sample was resolved by SDS-PAGE (12%  
838 polyacrylamide gel), transferred overnight to nitrocellulose membrane, and  
839 immunoblotted with antibodies against HA epitope or HCMV gB. Quantitation of  
840 secondary antibody fluorescence signals were performed using an Odyssey CLx  
841 scanner (Li-Cor, Inc., Lincoln, NE) in auto-scan mode. For each time-point, the signals  
842 from RIPA-soluble and insoluble bands were summed to yield total signal, and the ratio  
843 of insoluble band signal to total signal were also reported as percent insoluble HA over  
844 total HA signal.

845

846 **Statistical analyses.** Statistical analyses were carried out using GraphPad Prism 8.1.0  
847 for MacOS (GraphPad, Inc., San Diego, CA).

848

#### 849 **ACKNOWLEDGEMENTS.**

850 This project was supported by NIH grants R01-AI116851 (to J.P.K.) and P30-  
851 GM110703. Its contents are solely the responsibility of the authors and do not  
852 necessarily represent the official views of the NIAID or the NIGMS.

853 We are especially grateful to Erik L. Snapp (HHMI, Janelia Laboratories) for  
854 helpful discussions and detailed advice on interpretation of EM and confocal image data  
855 concerning the nature of the UL148-dependent ER structures. We also thank Dong Yu  
856 (Washington University, St. Louis, MO, currently GSK Vaccines), Thomas E. Shenk  
857 (Princeton University, Princeton, NJ), Richard J. Stanton (Cardiff University, United  
858 Kingdom), William J. Britt (University of Alabama, Birmingham), W. L. William Chang  
859 and Peter A. Barry (both of the University of California, Davis; Davis, CA), Christian  
860 Sinzger (University Medical Center Ulm, Ulm, Germany), Klaus Früh (Oregon Health  
861 Sciences University, Beaverton, OR), and Gregory A. Smith (Northwestern University,  
862 Chicago, IL) for generously sharing reagents.

863

#### 864 **AUTHOR CONTRIBUTIONS.**

865 Performed experiments: HZ, CR, CCN, MNAS, JvE. Data analysis and interpretation:  
866 HZ, CR, CCN, JvE, CS, JPK. Designed experiments: HZ, CR, CCN, JvE, and JPK.  
867 Contributed new reagents: HZ, CH, CCN, JPK. Electron microscopy and STEM



868 tomography: CR and JvE. Protein solubility analyses: CCN. Obtained funding: JPK.

869 Wrote the manuscript: JPK with comments from JvE and CR.

870 HZ performed all confocal immunofluorescence experiments with the exception of  
871 those shown in SI Figure S1D, which were carried out by JvE. HZ also carried out the  
872 viral replication kinetics experiments and constructed novel plasmids, including the  
873 lentivirus vectors used to isolating i148<sup>GFP</sup> and i159<sup>GFP</sup> ARPE-19 cell populations. HZ also  
874 carried out FRAP studies, performed all live cell imaging studies, and all Western blots in  
875 the study, except those otherwise specified below. CR carried out the TEM and STEM  
876 tomography studies. CCN constructed the TB\_159<sup>HA</sup> virus and conceived of and  
877 performed the protein solubility analyses comparing UL148 and Rh159. MS carried out  
878 the Western blotting studies on the effects of folimycin versus epoxomicin on UL148  
879 degradation. CH designed and carried out the strategy to incorporate an HA-tag at the C-  
880 terminus of *Rh159* in RhCMV 68-1. JPK and CN designed the strategies to construct all  
881 other new plasmids and recombinant BACs for the study; CN also designed and carried  
882 out the strategy to construct TB\_159<sup>HA</sup>. CS assisted with confocal imaging and with  
883 Imaris and Nikon software analyses of the 3D images.

884

885

886

887

888

889

890

891

892 **FIGURES.**

893  
894  
895  
896  
897  
898

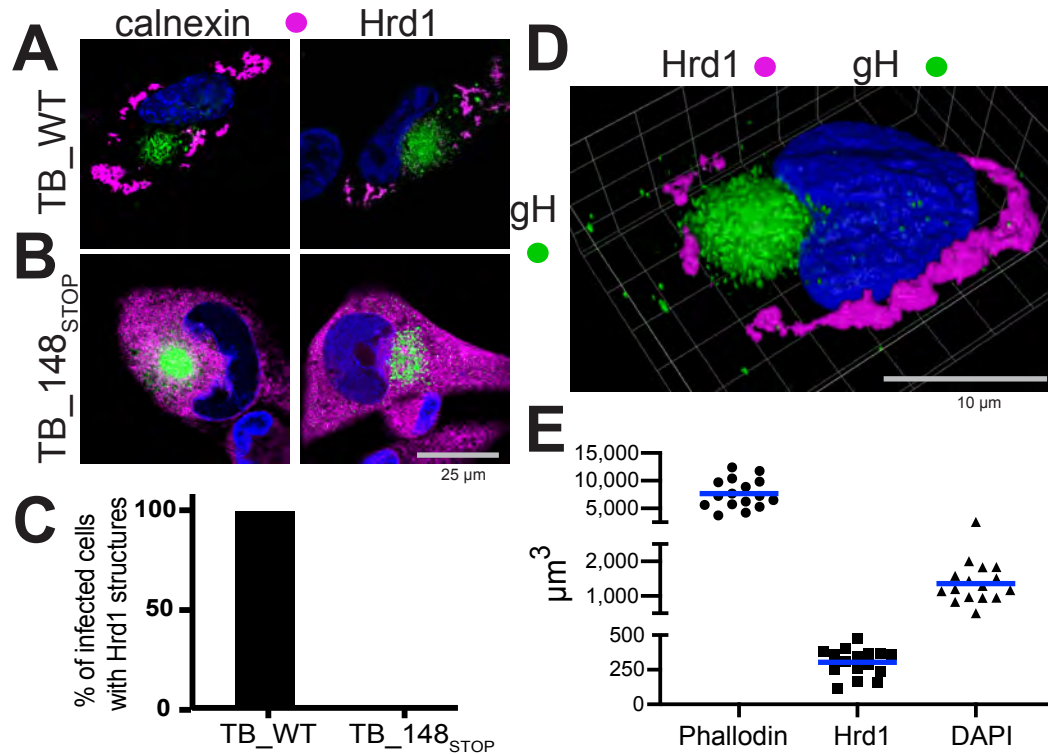

899  
900  
901  
902  
903  
904  
905  
906  
907  
908  
909  
910

**FIG 1. UL148 reorganizes ER markers into anomalous structures during HCMV infection.**

Fibroblasts infected at 1 MOI with either (A) wildtype HCMV strain TB40/E (TB\_WT) or (B) an isogenic *UL148*-null mutant (TB\_148<sub>STOP</sub>), were fixed at 96 h postinfection (hpi) and imaged by confocal microscopy after staining with antibodies specific for calnexin or Hrd1 (magenta) and glycoprotein H (gH, green), as indicated. DAPI (blue) signal was used to counterstain nuclei. (C) Percentage of fibroblasts that contain Hrd1 structures at 96 hpi; fifty gH-positive cells for each condition were scored for the presence or absence of UL148 structures (also see SI Fig S1A). (D) 3D confocal image projection of a TB\_WT infected fibroblast stained at 96 hpi for Hrd1 and gH. (E) Volumetric measurements were made from sixteen infected cells, stained with phalloidin-AlexaFluor 594 conjugate to estimate total cell volume, with Hrd1 antibody to estimate the volume of UL148-dependent ER structures, and with DAPI to estimate nuclear volume.

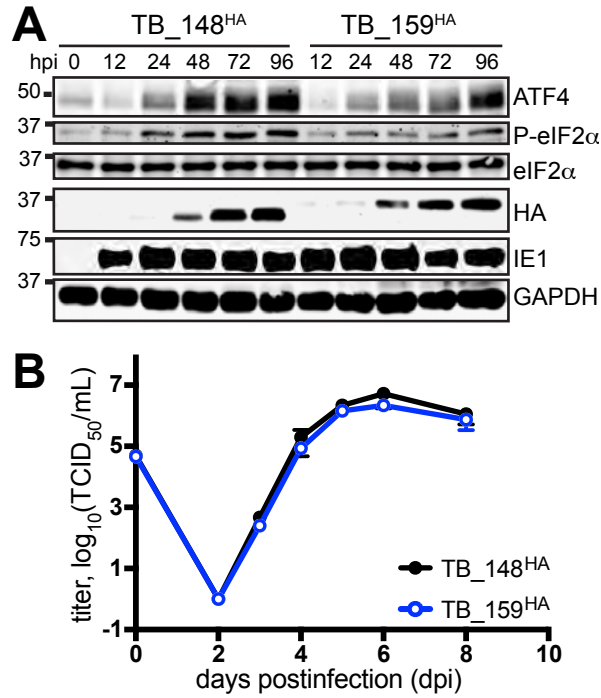

911  
912  
913  
914  
915  
916  
917  
918  
919  
920

**FIG 2. Characterization of TB\_148<sup>HA</sup> and TB\_159<sup>HA</sup> viruses.** (A) Human fibroblasts were infected at MOI 1 with the indicated recombinant HCMVs and whole cell lysate samples harvested at the indicated times post-infection (h post-infection: hpi) were analyzed by Western blot to detect HA-tagged UL148 or Rh159, the 72 kD viral nuclear antigen IE1-72 (IE1), and GAPDH. (B) Single-cycle viral replication kinetic curves from MOI 1 infected fibroblasts were plotted by determining the titer in tissue culture infectious dose 50 (TCID<sub>50</sub>) from supernatants collected at the indicated times postinfection.

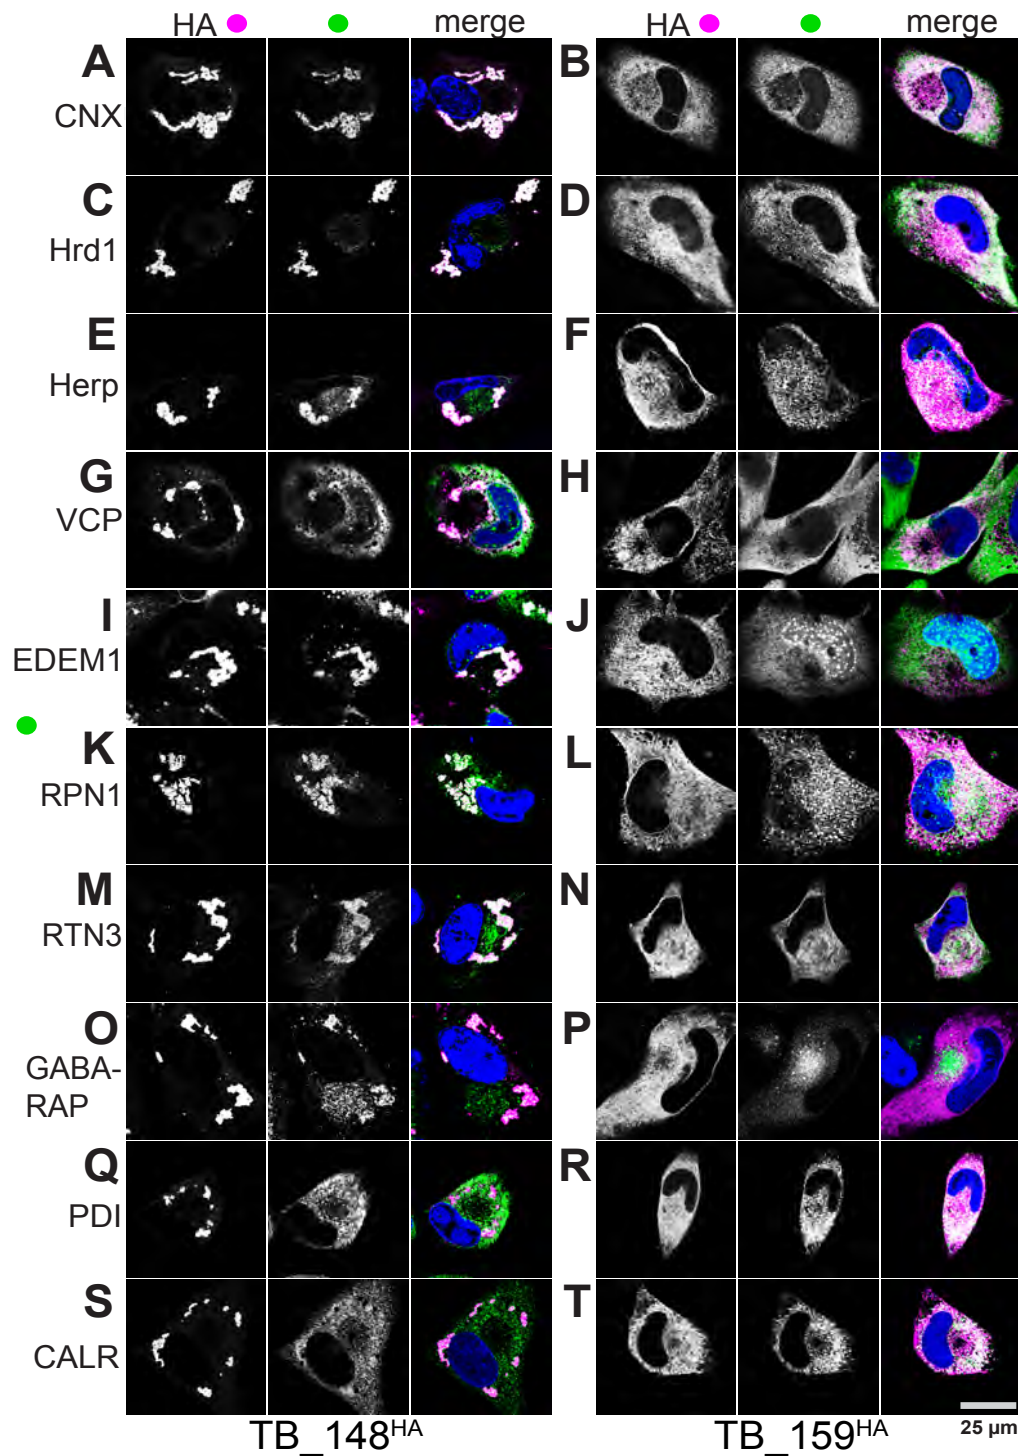

921  
922  
923  
924  
925  
926  
927

**FIG 3. UL148 localizes to unusual ER compartments that are enriched for glycoprotein quality control markers.** Fibroblasts infected at MOI 1 with either TB\_148<sup>HA</sup> (panels: A, C, E, G, I, K, M, O, Q, S) or TB\_159<sup>HA</sup> (panels: B, D, F, H, J, L, N, P, R, T) were fixed at 96 h postinfection, and imaged by confocal microscopy after co-staining with antibodies specific for HA (UL148 / Rh159, magenta in merge) and the indicated cellular markers (green in merge). DAPI (blue) counterstaining is shown in merged image.

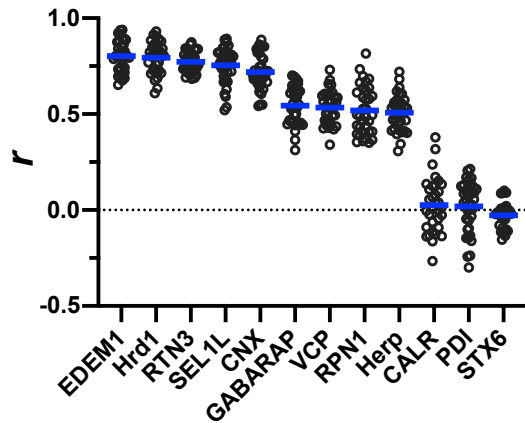

928  
929 **FIG 4. Quantification of co-localization between UL148 and cellular markers.** A Pearson's correlation  
930 coefficient ( $r$ ) was calculated using NIH ImageJ software to estimate the degree of co-localization between  
931 UL148 (HA signal) and each of the indicated cellular markers. A minimum of 30 cells were analyzed per  
932 marker. The arithmetic mean for each co-localization analysis result is shown as a blue line, and data  
933 points for individual cells analyzed are plotted as circles.

934  
935  
936  
937  
938

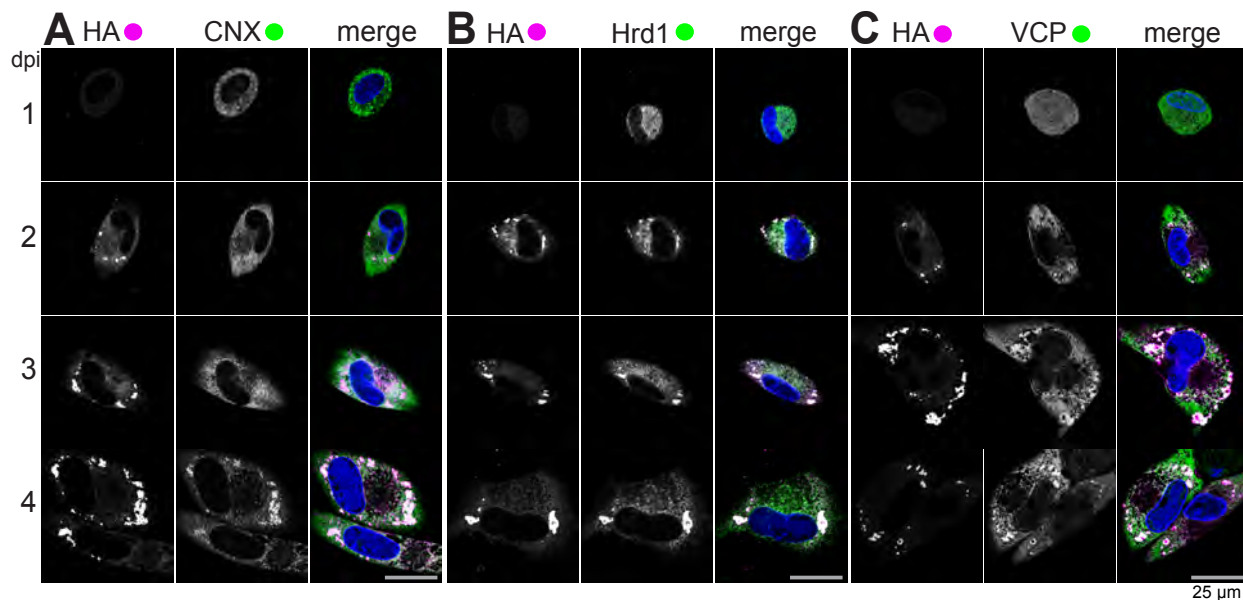

939  
940 **FIG 5. Cellular proteins involved in glycoprotein quality control are recruited with differing kinetics**  
941 **to UL148 ER structures.** Fibroblasts infected with TB\_148<sup>HA</sup> at 1 MOI were fixed at the indicated time  
942 points (days post infection, dpi) and imaged by confocal microscopy after staining with antibodies specific  
943 for HA (UL148, magenta), CNX (green, **A**), Hrd1 (green, **B**) or VCP (green, **C**), DAPI (blue).

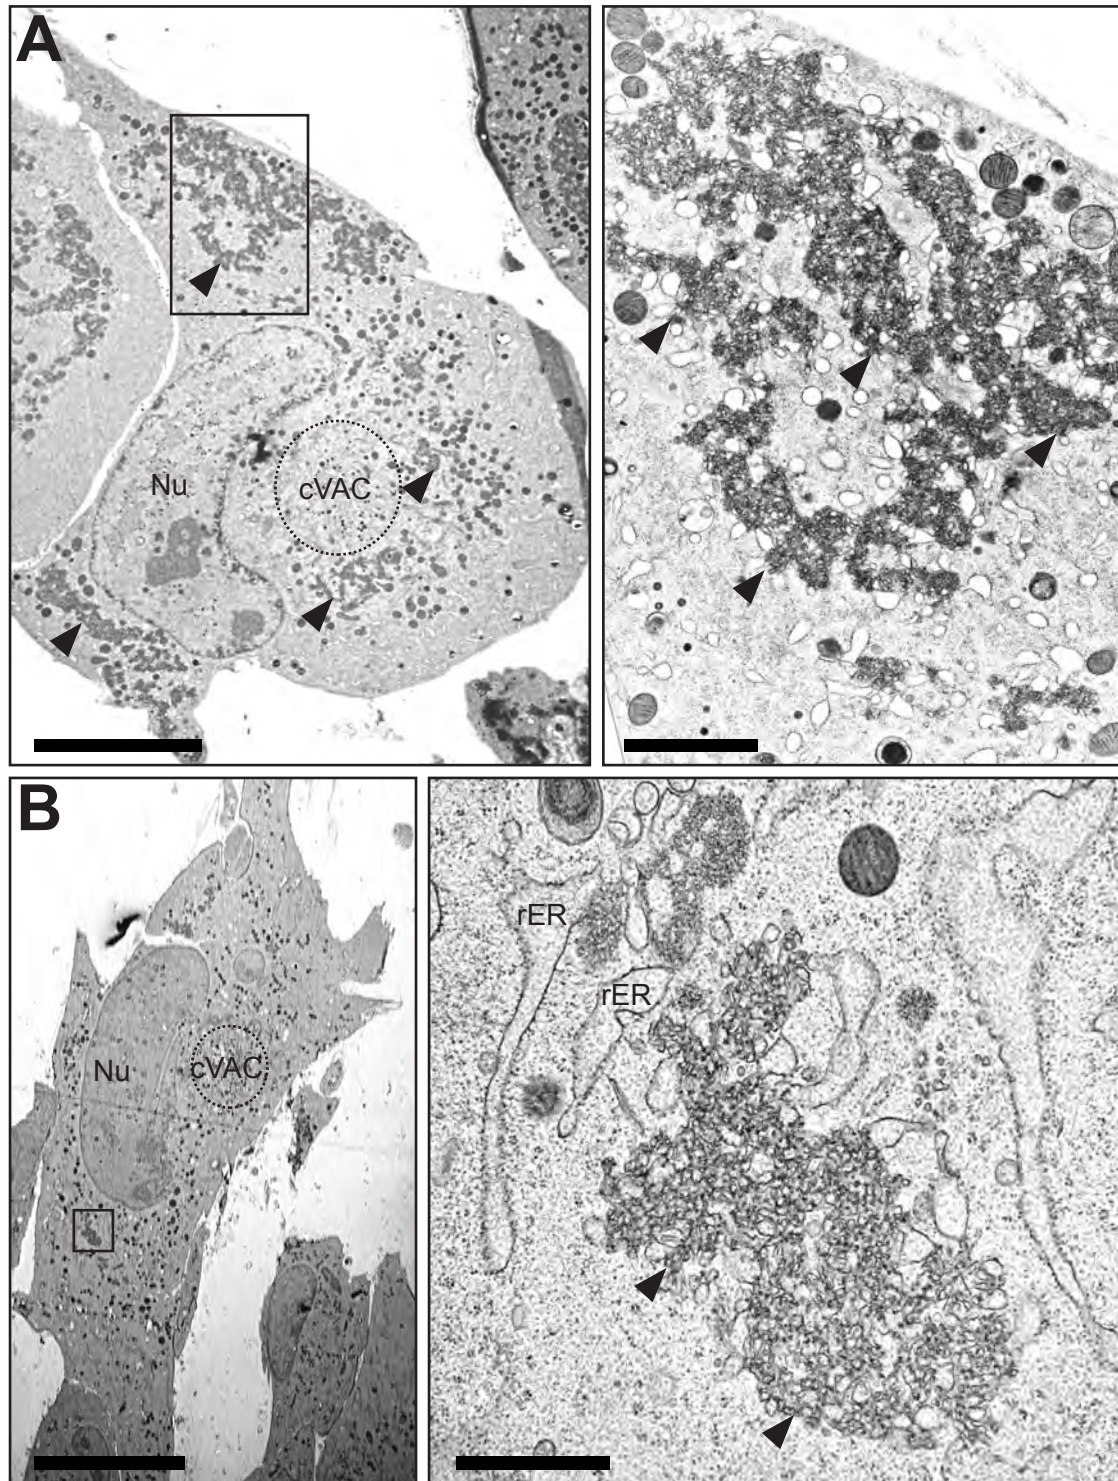

944  
945  
946  
947  
948  
949  
950  
951

**FIG 6. TEM of ER structures in wild-type HCMV infected cells.** Human fibroblasts infected with wildtype HCMV (TB\_WT) were fixed by high-pressure freezing and freeze substitution at day 5 postinfection and imaged using TEM. Panels (A) and (B) show cell overview at left. For each cell, the boxed region is shown at higher magnification. Scale bars; left panels: 10  $\mu$ m, right panels: 2  $\mu$ m. rER: rough ER; Nu: nucleus; cVAC: cytoplasmic viral assembly compartment. Solid arrowheads indicate the UL148-dependent ER structures of interest.

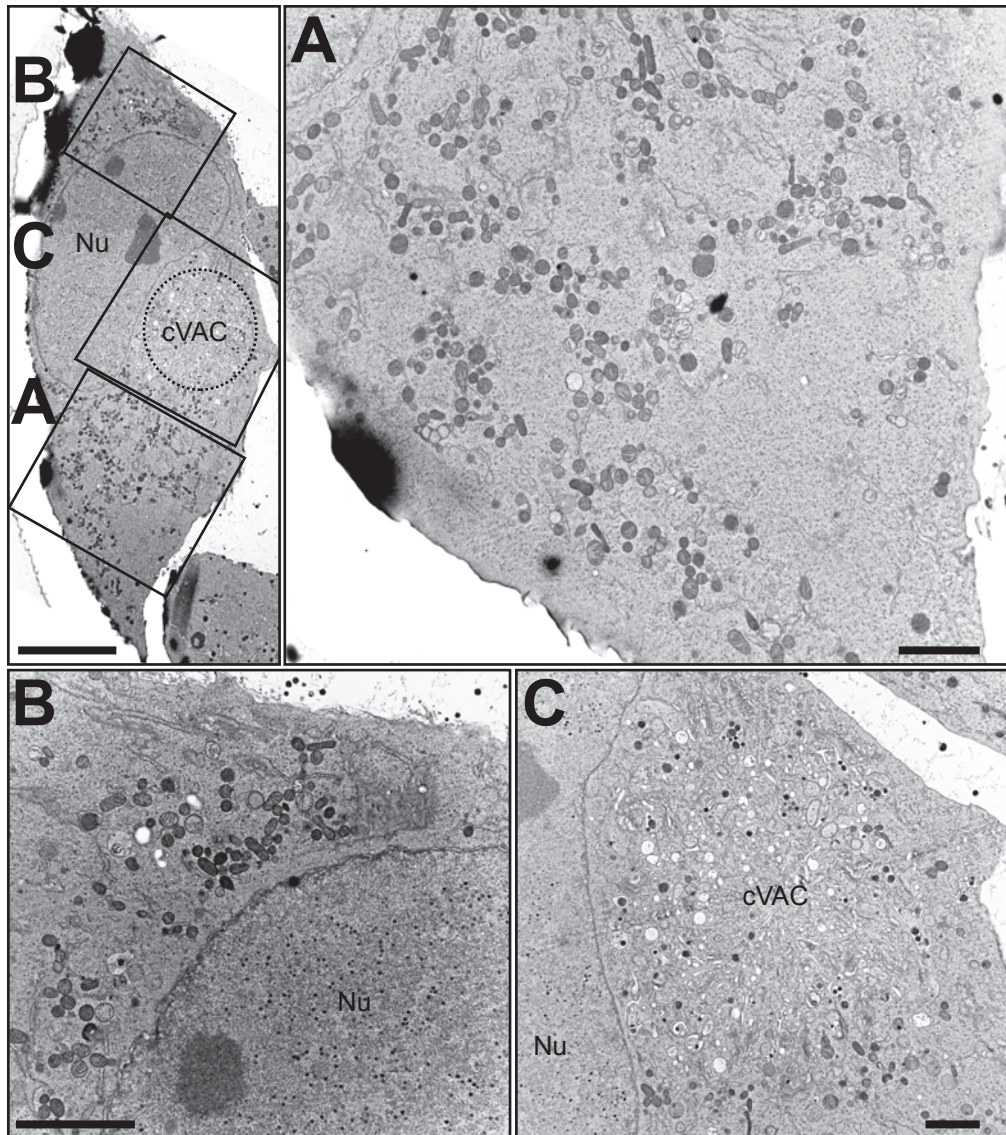

952  
953  
954  
955  
956  
957  
958  
959  
960  
961

**FIG 7. TEM of *UL148*-null HCMV infected cells.** Human fibroblasts infected with a *UL148*-null mutant (TB\_148<sub>STOP</sub>) were fixed by high-pressure freezing and freeze substitution at day 5 postinfection and imaged using TEM. At the upper left an overview panel of a representative cell is shown with panels (A), (B), and (C) each boxed. The boxed regions are expanded at higher magnification at right (A) and below (B, C). Scale bars for upper left overview panel: 10 μm, for zoomed panels: 2 μm. rER: rough ER; Nu: nucleus; cVAC: cytoplasmic viral assembly compartment.

962

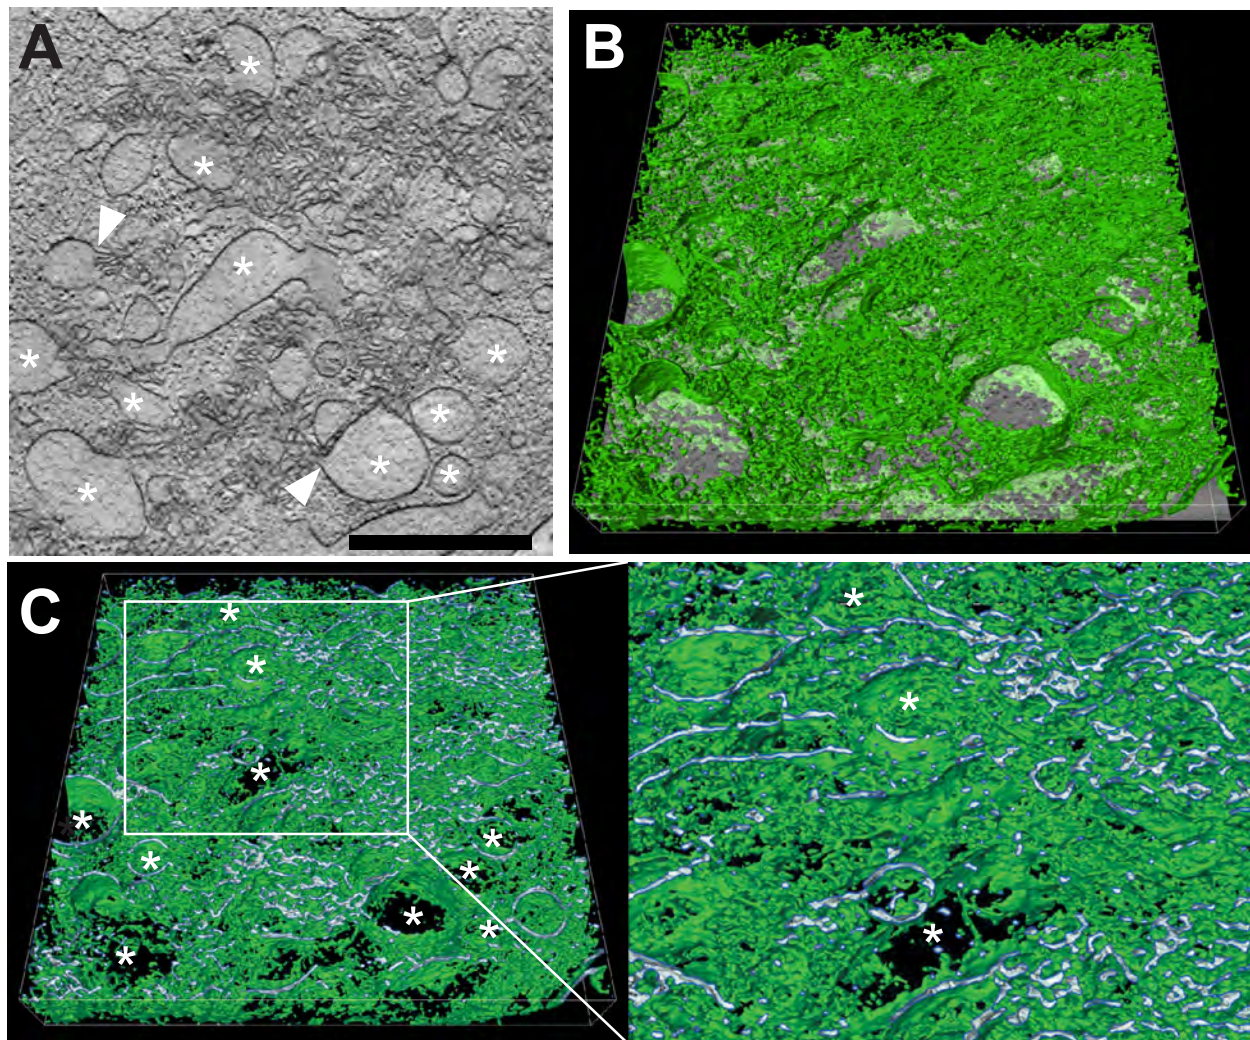

963

964

965 **FIG 8. STEM tomography of UL148-dependent ER structures in HCMV infected cells.** Human  
966 fibroblasts infected with wildtype HCMV (TB\_WT) were fixed by high-pressure freezing and freeze  
967 substitution at day 5 postinfection and tomograms were recorded by STEM. (A) Shows a virtual section  
968 through the tomogram of a virus-induced membranous structure; asterisks denote ER structures of  
969 distended luminal space. White arrowheads indicate sites at which membranes originating from  
970 distended ER cisternae continue into areas of involuted collapsed ER. Scale bar: 1  $\mu$ m. (B) Shows the  
971 same virtual section as in (A) tilted and with a 3D visualization of the membranous network (green) of the  
972 entire tomogram. The same distended ER cisternae as in (A) are marked by asterisks. (C) Shows a cross  
973 section through (B) to visualize the membrane profile of the membranous structures. The region  
974 delimited by a white box is shown in a higher magnification on the right. Finer detail of the enlarged ER  
975 cisternae and the connections between them are readily visible; asterisks indicate the same distended ER  
976 cisternae as in panels (A) and (B). Also, see SI Movie S1. Scale bar: 1  $\mu$ m.



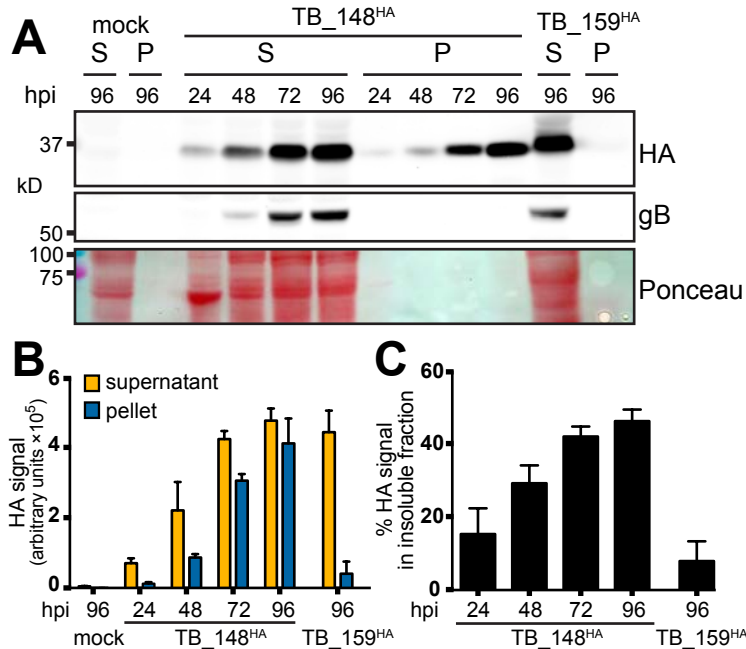

977

978

979

980

981

982

983

984

985

986

987

988

989

990

991

992

993

**FIG 9. Solubility analysis of UL148 and Rh159.** (A) Human fibroblasts were infected at MOI 1 TCID<sub>50</sub>/cell with HCMV strain TB40/E derived viruses TB<sub>148</sub><sup>HA</sup>, which expresses UL148 fused at its C-terminus to an HA-epitope tag, or TB<sub>159</sub><sup>HA</sup>, which lacks *UL148* and instead expresses rhesus CMV Rh159 carrying a C-terminal HA tag. At the indicated times postinfection (hpi), infected cells were collected radioimmunoprecipitation (RIPA) lysis buffer, centrifuged at 21,000 × *g* for 30 min, after which supernatant (sup) and pellet (pel) fractions were boiled in gel loading buffer containing 2% sodium dodecyl sulfate (SDS). Equivalent portions of supernatant and pellet were resolved by SDS-polyacrylamide gel electrophoresis, transferred to a nitrocellulose membrane for detection of protein species immunoreactive to antibodies against HA epitope (HA) and HCMV glycoprotein B (gB) and for total protein signal using Ponceau S reagent (Ponceau). (B-C). Signal intensity of fluorophore-conjugated secondary antibodies in anti-HA Western blots were measured from three independent biological replicates of the experiment shown in (A); error bars indicate standard deviation. (B) The fluorescent signal for each infection time point condition (Y-axis indicates arbitrary units, in hundred thousands). (C) The amount of signal found in the insoluble (pellet) fraction relative to the total signal (pellet plus supernatant) for each infection time point are plotted as percentage values.

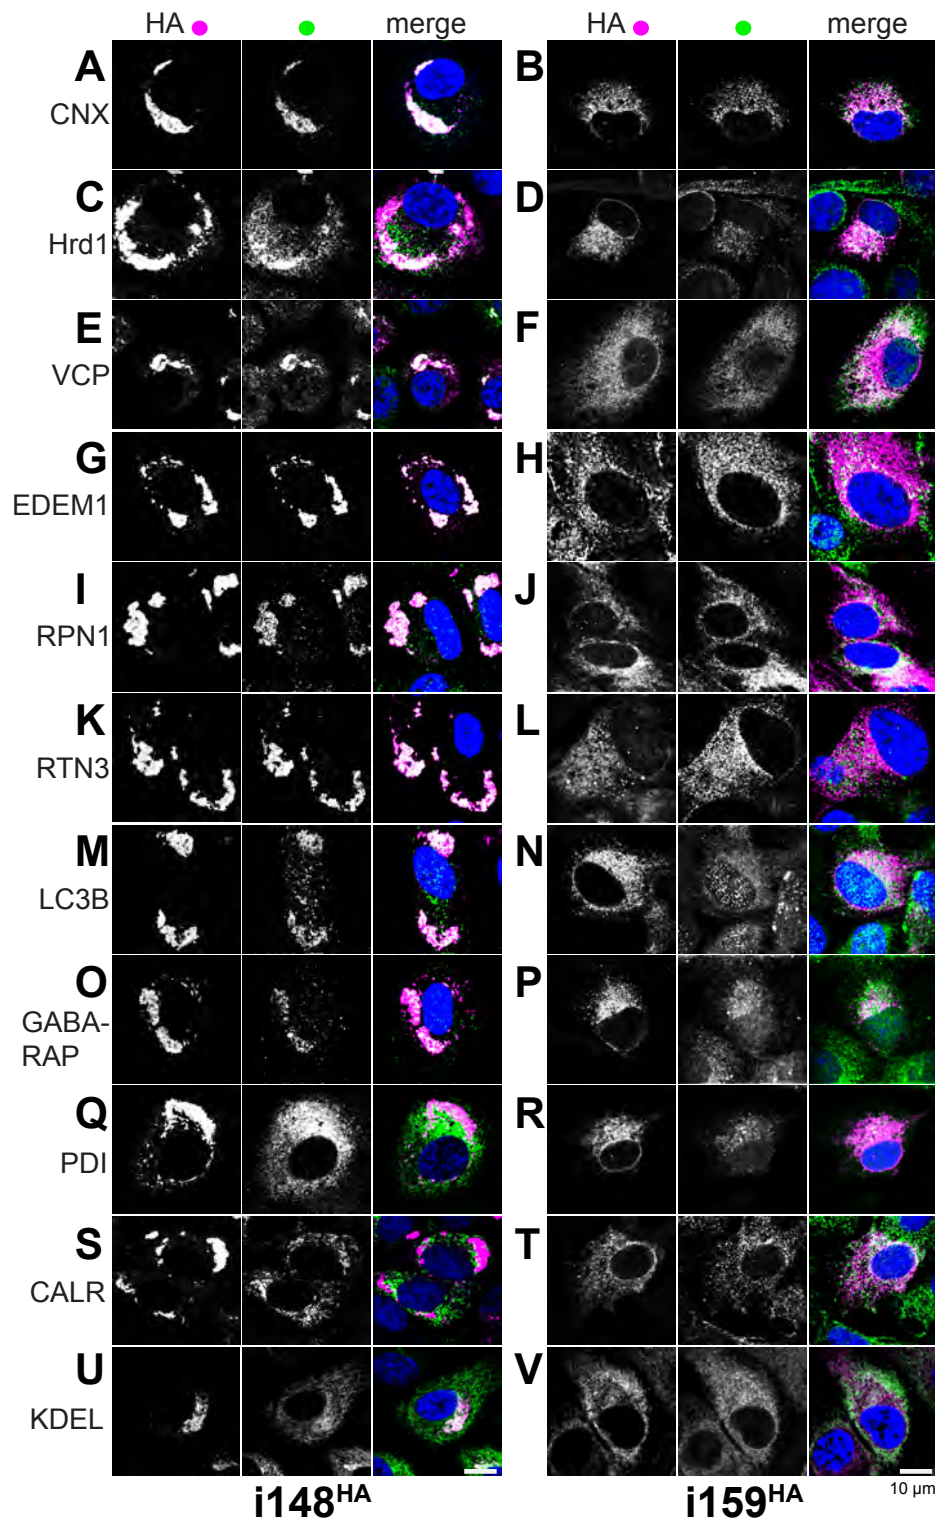

994  
995  
996  
997  
998  
999  
1000

**FIG 10. UL148 is sufficient to remodel the ER.** HA-tagged UL148 or Rh159 were doxycycline (dox) induced in the context of a “tet-on” lentiviral vector system in stably transduced ARPE-19 epithelial cell populations, i148<sup>HA</sup> and i159<sup>HA</sup>, respectively. Cells were fixed at 48 h postinduction for indirect immunofluorescence staining for the indicated cellular markers (green) together with HA (magenta). Scale bar: 10  $\mu$ m.

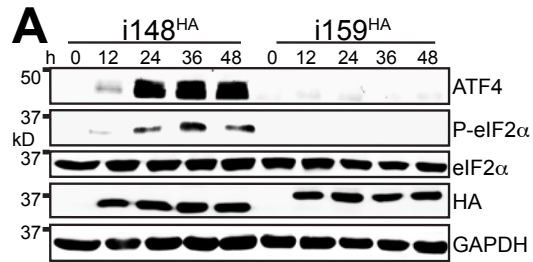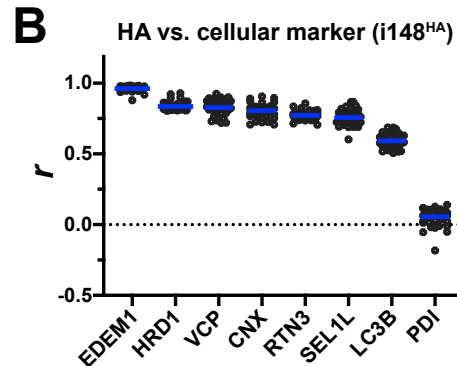

**FIG 11. ISR activation accompanies redistribution of ER markers during ectopic expression of UL148.** (A) Lysates of tet-on ARPE-19 cells expressing either UL148 or Rh159 fused to an HA tag,  $i148^{HA}$  and  $i159^{HA}$ , respectively, were collected at the indicated times post doxycycline (dox) induction and analyzed by Western blot for the expression of the indicated proteins and for the abundance of eIF2 $\alpha$  phosphorylated at Ser51 (P-eIF2 $\alpha$ ) using a phospho-specific antibody. (B) Pearson's correlation coefficient ( $r$ ) values were calculated using NIH ImageJ software estimate the degree of co-localization between UL148 (HA signal) and the indicated cellular markers. A minimum of 30 cells were analyzed per marker. Arithmetic means for each co-localization analysis result are shown as blue lines, and data points for individual cells analyzed are plotted as circles.

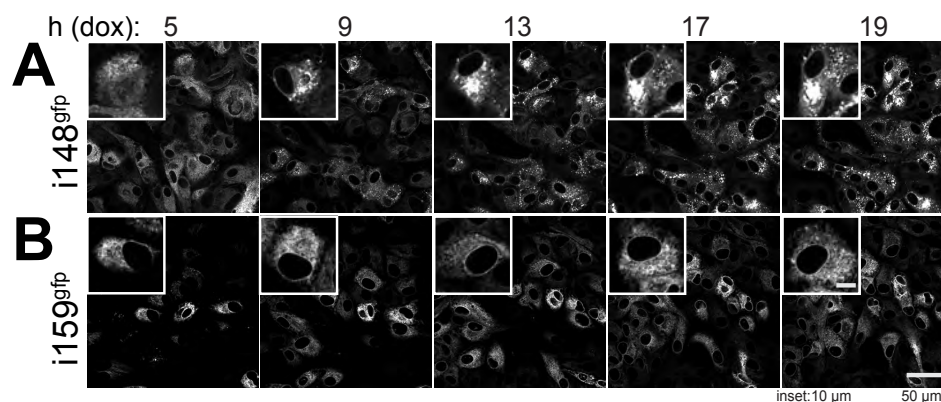

**FIG 12. Live-cell Imaging of UL148-GFP and Rh159-GFP during induced ectopic expression.** “Tet-on” ARPE-19 epithelial cells that inducibly express either UL148 or Rh159 fused to green fluorescent protein (gfp),  $i148^{gfp}$  (A) and  $i159^{gfp}$  (B), respectively, were induced for transgene expression using 100 ng/mL doxycycline (dox) and imaged using live-cell microscopy. Images from the selected time points (h post treatment with dox, hpt) are shown. The main scale bar represents 50  $\mu$ m. For inset panels at upper left of each image, which are magnified 2.4 $\times$  relative to the main image, the scale bar represents 10  $\mu$ m. Also see SI Movies S2-S3.

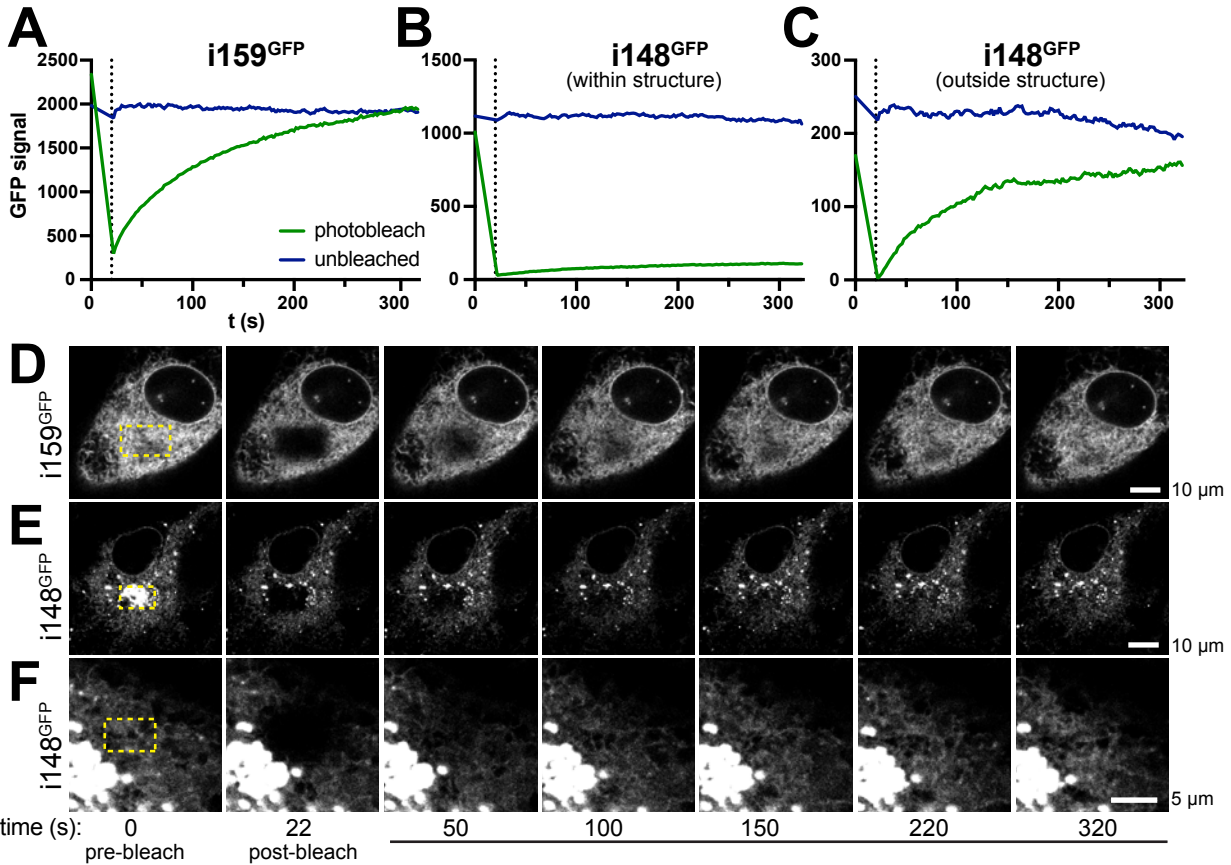

1024  
 1025  
 1026  
 1027  
 1028  
 1029  
 1030  
 1031  
 1032  
 1033  
 1034  
 1035  
 1036  
 1037

**FIG 13. FRAP analysis.** ARPE-19 cells that inducibly express Rh159-GFP, i159<sup>gfp</sup> (**A**) or UL148-GFP, i148<sup>gfp</sup> (**B-C**) were doxycycline induced for 24 h (100 ng/mL doxycycline (dox)). Separate regions of GFP signal in selected cells were photobleached (405 nm laser) or left unbleached, while a third region lacking GFP signal was chosen as a background reference were measured before and during fluorescence recovery after photobleaching (FRAP). Note: background signal was not plotted because values were resolvable from the x-axis. GFP signal intensity is plotted over a time period (seconds, s) starting with an exposure at t=0 (immediately before photobleaching), and including measurements taken every 2 s after photobleaching (0-20 s) until termination of the measurement series at t=322 s (300 s of FRAP). (**D-F**) Images from the selected time points (s, seconds) immediately before and after bleaching, and during fluorescence recovery period. Also see SI Movies S4-S6.

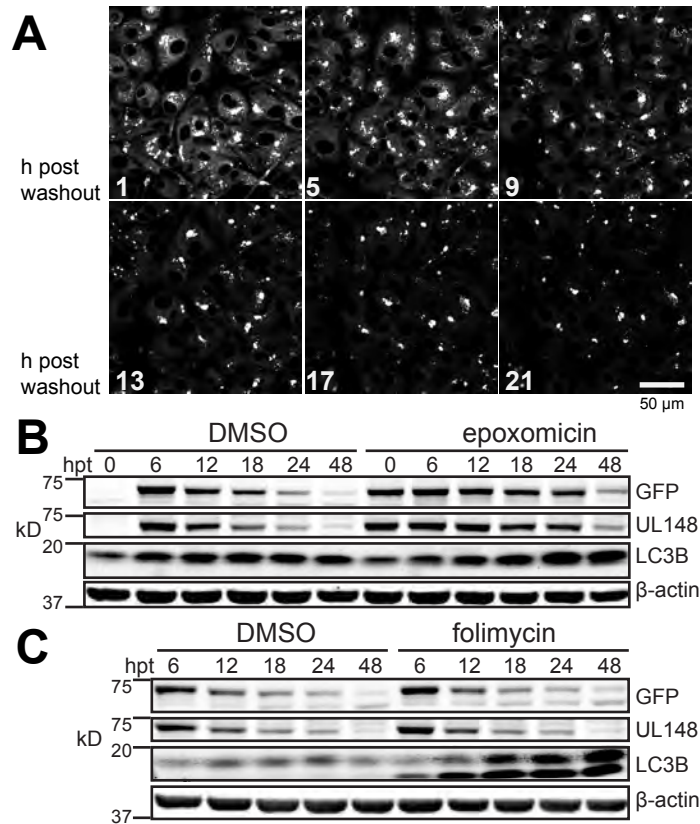

1038  
1039  
1040  
1041  
1042  
1043  
1044  
1045  
1046  
1047  
1048

**FIG 14: UL148-GFP is stabilized by inhibition of proteasomal but not lysosomal degradation.** “Tet-on” ARPE-19 cells that inducibly express UL148-GFP (i148<sup>GFP</sup>) were induced for 24 h by the addition of 100 ng/mL doxycycline (dox), after which the dox inducing agent was washed out and medium containing either the proteasome inhibitor epoxomicin (20  $\mu$ M) or the proton pump inhibitor folimycin (115 nM) was added and samples were harvested for Western blot analysis at the indicated times post treatment (h post treatment, hpt) with folimycin or epoxomicin. DMSO was added at 0.1% to control for folimycin, or 1% to control for epoxomicin. Also see SI Movie S7.

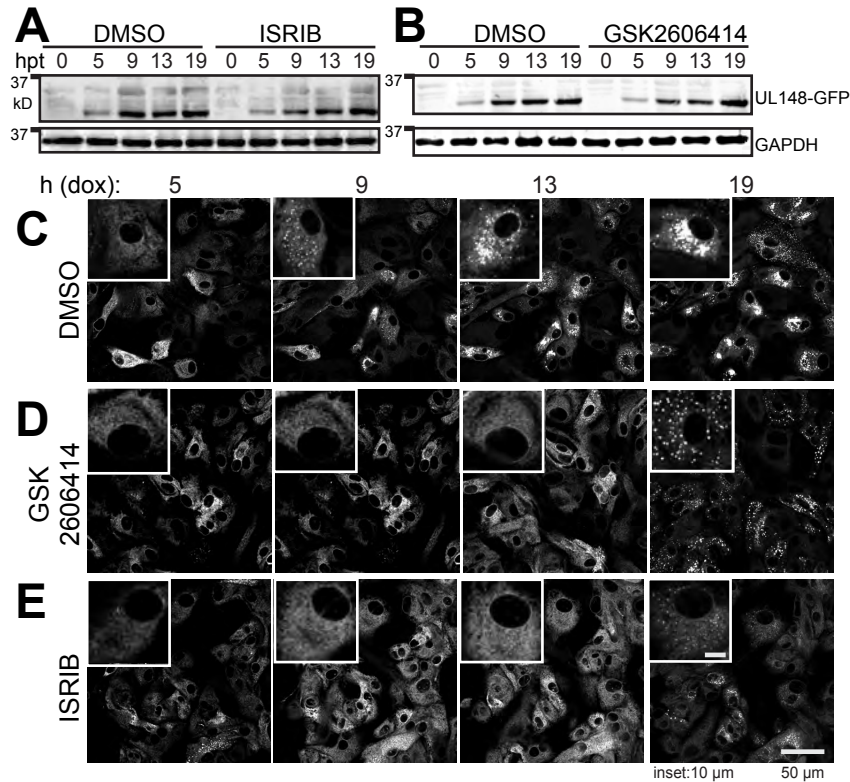

1049  
1050  
1051  
1052  
1053  
1054  
1055  
1056  
1057  
1058  
1059  
1060  
1061

**FIG 15. Inhibition of the integrated stress response impedes UL148-mediated ER remodeling.** “Tet-on” ARPE-19 epithelial cells that inducibly express either UL148 or Rh159 fused to green fluorescent protein (gfp), *i148<sup>gfp</sup>* (**A**) and *i159<sup>gfp</sup>* (**B**), respectively, were induced for transgene expression using 100 ng/mL doxycycline (dox) in the presence or absence of either ISRIB (200 nM) or GSK2606414 (1.1  $\mu$ M) and monitored by anti-UL148 Western blot for expression of UL148-GFP over a series of time points (h post treatment with dox, hpt). (**C-E**): Live-cell imaging of UL148-GFP and Rh159-GFP expression patterns in the presence of ISRIB (200 nM), GSK2606414 (1.1  $\mu$ M), or DMSO vehicle (0.01%). Main scale bar represents 50  $\mu$ m. For inset panels at upper left of each image, which are magnified 2.4 $\times$  relative to the main image, the scale bar represents 10  $\mu$ m. Also see SI Movies S8-S10.

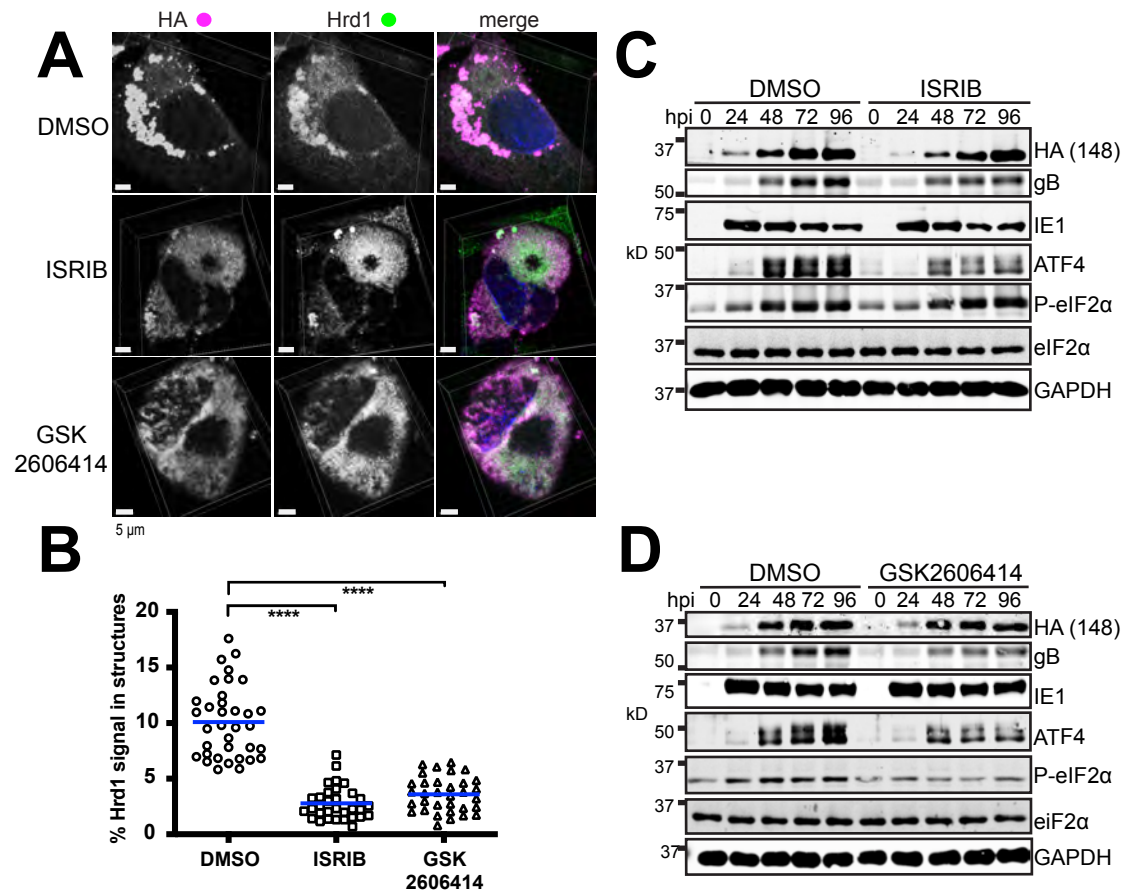

1062  
1063  
1064  
1065  
1066  
1067  
1068  
1069  
1070  
1071  
1072  
1073  
1074  
1075  
1076  
1077  
1078

**FIG 16. Inhibition of the ISR prevents the coalescence of Hrd1 and UL148 into discrete structures during infection.** (A) Representative 3D maximum intensity projections of confocal imaging Z-stacks obtained from cells infected at MOI 1 for 96 h with HCMV strain TB40/E carrying an HA-tagged *UL148*, TB\_148<sup>HA</sup>, and maintained in the presence of ISRIB (200 nM), GSK2606414 (1.1  $\mu$ M), or DMSO carrier alone (0.1% vol/vol). In merged images HA signal is shown in magenta, Hrd1 in green, and DAPI counterstaining in blue. (B) The percent of Hrd1 antibody signal involved in discrete structures at 96 hpi were calculated for a minimum of 30 cells per condition were determined using Imaris x64 9.3.0 software. Statistical significance was determined using a one-way ANOVA followed by Tukey's post-test; \*\*\*\* represents a P-value of <0.0001. The arithmetic mean for co-localization analysis results are shown as blue lines with data points for individual cells analyzed plotted as circles, squares or triangles, as indicated. (C-D) Western blot analyses of fibroblasts infected at MOI 1 with TB\_148<sup>HA</sup> and maintained in the presence of ISRIB (200 nM), GSK2606414 (1.1  $\mu$ M), or DMSO carrier alone (0.01%); hpi: h post infection (hpi). Note: a phospho-specific antibody was used for detection of eIF2 $\alpha$  phosphorylated at Ser51 (P-eIF2 $\alpha$ ).

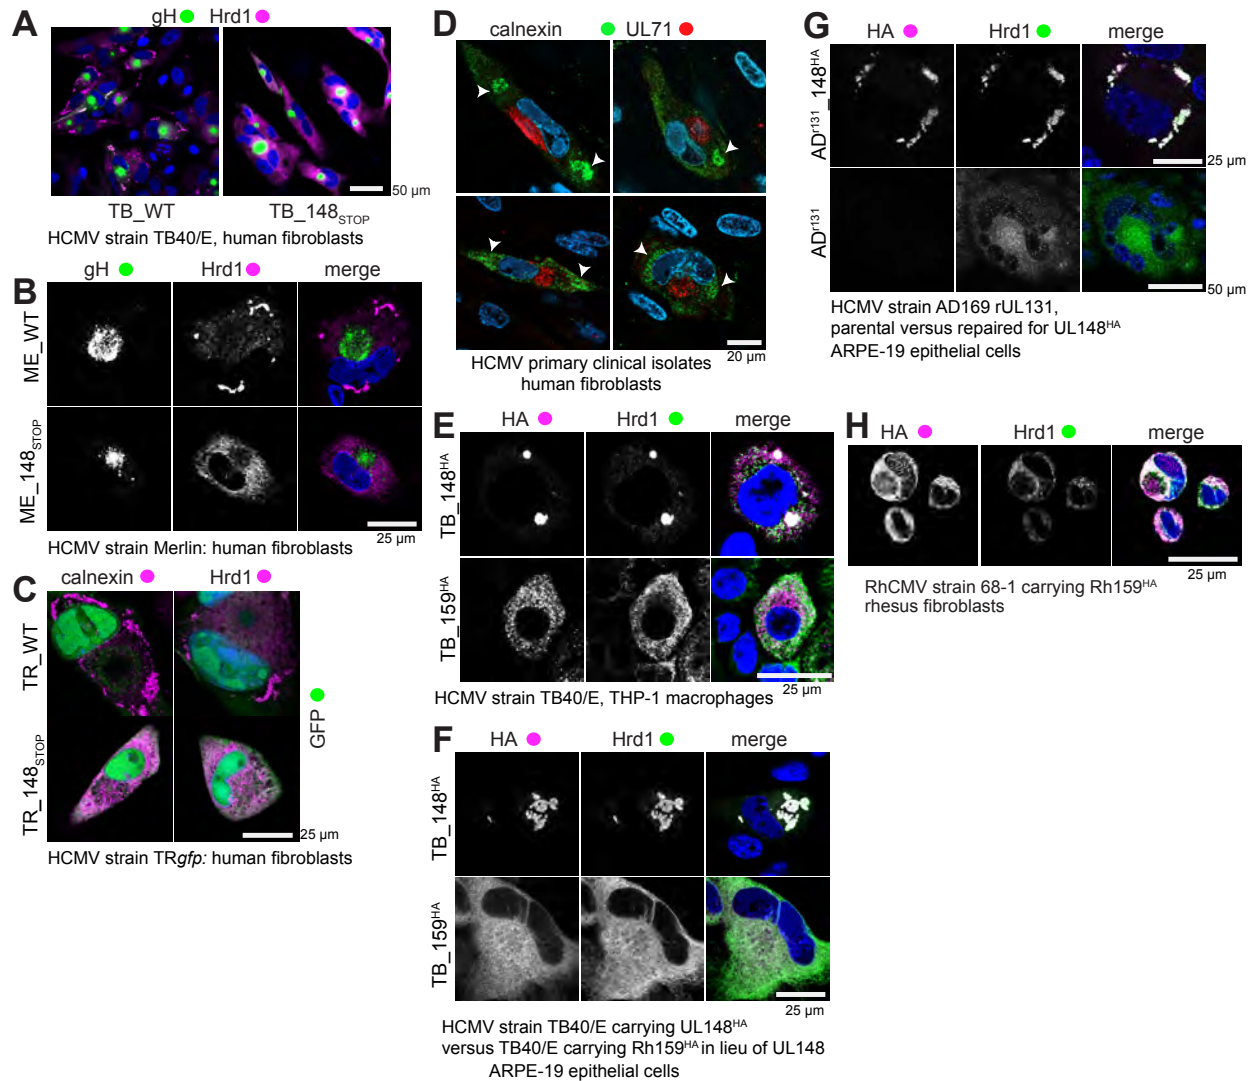

1079  
 1080 **FIG S1: Additional indirect immunofluorescent confocal microscopy results from infected cells.**  
 1081 (A) Lower magnification overview of results from FIGS 1A-B; staining of HCMV glycoprotein H (gH) and  
 1082 Hrd1 at 96 h postinfection (hpi) of human fibroblasts with wildtype HCMV strain TB40/E (WT) versus  
 1083 *UL148*-null derivative TB\_148<sub>STOP</sub>. (B) Staining of gH and Hrd1 at 96 hpi of human fibroblasts with  
 1084 wildtype Merlin recovered from BAC-cloned Merlin pAL1393 (ME\_WT) or a *UL148*-null derivative of the  
 1085 same virus (ME\_148<sub>STOP</sub>.) (C): Staining of gH and Hrd1 at 96 hpi of human fibroblasts with wildtype  
 1086 HCMV strain TRgfp recovered from BAC-cloned TRgfp (TR\_WT) or a *UL148*-null derivative of the same  
 1087 virus (TR\_148<sub>STOP</sub>). (D) Staining of the viral tegument protein UL71 and calnexin 5 days postinfection of  
 1088 human fibroblasts with primary clinical HCMV isolates obtained from patient throat swabs. (E) Staining  
 1089 against HA and Hrd1 in THP-1 macrophages fixed at 96 hpi with HCMV strain TB40/E derivative viruses  
 1090 TB\_148<sup>HA</sup> or TB\_159<sup>HA</sup>; note: THP-1 monocytes were differentiated using phorbol ester treatment. (F)  
 1091 Staining of HA and Hrd1 in ARPE-19 epithelial cells infected for 96 h with either TB\_148<sup>HA</sup> or TB\_159<sup>HA</sup>.  
 1092 (G) Staining of HA and Hrd1 in ARPE-19 epithelial cells infected for 96 h with HCMV strain AD169  
 1093 repaired for *UL131* and to which an HA-tagged UL148 CDS from TB40/E was restored to the native  
 1094 *UL148* locus (AD<sup>r131</sup>\_148<sup>HA</sup>) or with a parental AD169 virus repaired for *UL131* to which *UL148* was not  
 1095 restored (AD<sup>r131</sup>). Notes: (i) a functional *UL131* is required for efficient infection of epithelial cells; (ii) for  
 1096 AD<sup>r131</sup> we did not employ a viral marker (e.g., HA) to identify infected cells, so the appearance of  
 1097 syncytia and the characteristic kidney-bean shaped nucleus was used to indicate infected cells and a  
 1098 slightly lower magnification was used to best show these features, hence a different scale bar was used.  
 1099 (H) Staining for HA and Hrd1 in telomerase-immortalized rhesus fibroblasts infected with BAC-derived  
 1100 rhesus CMV (RhCMV) strain 68-1 carrying an HA-tag at the C-terminus of Rh159.



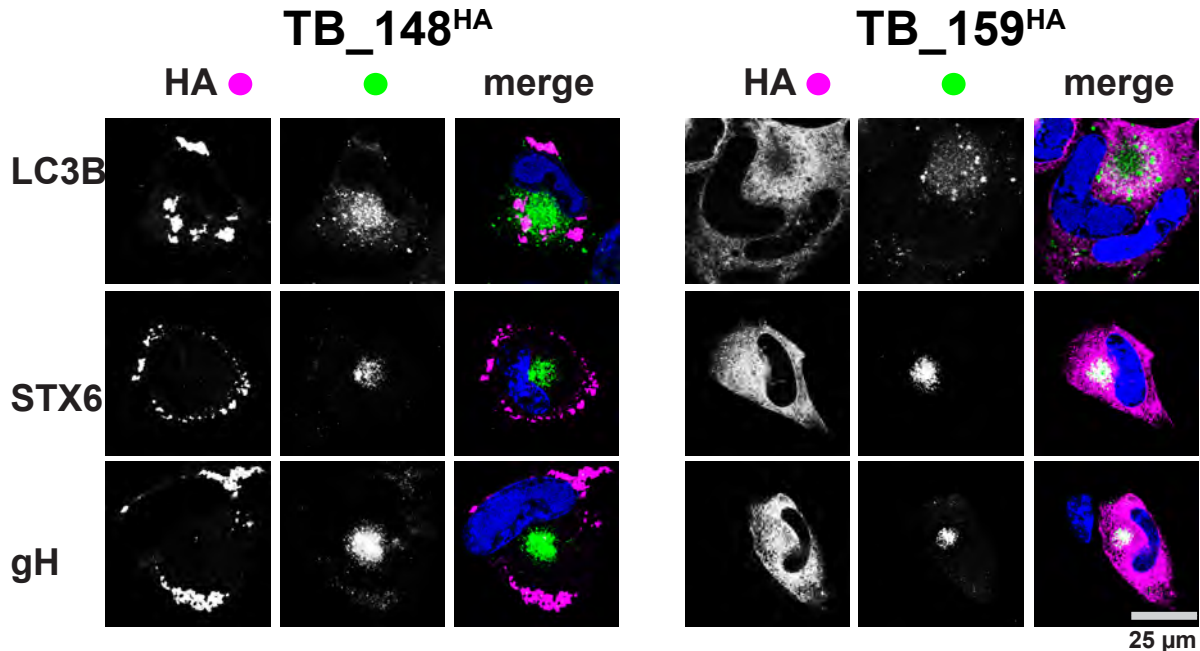

1101  
1102  
1103  
1104  
1105  
1106  
1107  
1108  
1109  
1110

**FIG S2: Confocal microscopy of LC3B, syntaxin-6 and glycoprotein H staining during HCMV infection.** Human fibroblasts were infected with the indicated viruses for 96 h and then fixed, permeabilized, and stained using antibodies specific for the indicated proteins. Indirect immunofluorescence images were captured using a 63X objective on a Leica SP5 confocal microscope. gH: glycoprotein H, STX6: syntaxin-6.

1111 **SUPPLEMENTARY VIDEO FILES.**

1112  
1113  
1114  
1115  
1116  
1117  
1118  
1119  
1120

**Movie S1: STEM tomography of anomalous ER structures in wildtype HCMV infected fibroblasts at day 5 postinfection.**

**Movies S2 – S3: Live cell imaging of GFP signal following dox induction of transgene expression in i148<sup>GFP</sup> and i159<sup>GFP</sup> ARPE-19 epithelial cells.**

**Movie S2: i148<sup>GFP</sup> cells from 2-19 h post dox induction.**

**Movie S3: i159<sup>GFP</sup> cells from 2-19 h post dox induction.**

1121  
1122  
1123  
1124  
1125

**Movies S4-S6: FRAP.**

**Movie S4: FRAP of UL148-GFP structure (ER within structure)**

**Movie S5: FRAP of UL148 GFP structure (ER outside structure)**

**Movie S6: FRAP of Rh159-GFP.**

1126  
1127  
1128

**Movie S7: Imaging of UL148-GFP following washout of doxycycline (dox) up to 21 h 37 min post washout of dox.**

1129  
1130  
1131  
1132  
1133

**Movies S8-S10: ISR blockade.**

**Movie S8: i148<sup>GFP</sup> cells in the presence of 0.01% DMSO, from 2-19 h post dox induction.**

**Movie S9: i148<sup>GFP</sup> cells in the presence of 1.1 μM GSK2606414, from 2-19 h post dox induction.**

**Movie S10: i148<sup>GFP</sup> cells in the presence of 200 nM ISRIB, from 2-19 h post dox induction.**

1134 **REFERENCES.**

1135

- 1136 1. Li G, Nguyen CC, Ryckman BJ, Britt WJ, Kamil JP. 2015. A viral regulator of glycoprotein  
1137 complexes contributes to human cytomegalovirus cell tropism. *Proc Natl Acad Sci U S A*  
1138 112:4471-6.
- 1139 2. Wille PT, Knoche AJ, Nelson JA, Jarvis MA, Johnson DC. 2010. A human cytomegalovirus  
1140 gO-null mutant fails to incorporate gH/gL into the virion envelope and is unable to enter  
1141 fibroblasts and epithelial and endothelial cells. *J Virol* 84:2585-96.
- 1142 3. Jiang XJ, Adler B, Sampaio KL, Digel M, Jahn G, Ettischer N, Stierhof YD, Scrivano L,  
1143 Koszinowski U, Mach M, Sinzger C. 2008. UL74 of human cytomegalovirus contributes to  
1144 virus release by promoting secondary envelopment of virions. *J Virol* 82:2802-12.
- 1145 4. Zhou M, Lanchy JM, Ryckman BJ. 2015. Human Cytomegalovirus gH/gL/gO Promotes the  
1146 Fusion Step of Entry into All Cell Types, whereas gH/gL/UL128-131 Broadens Virus  
1147 Tropism through a Distinct Mechanism. *J Virol* 89:8999-9009.
- 1148 5. Wu Y, Prager A, Boos S, Resch M, Brizic I, Mach M, Wildner S, Scrivano L, Adler B. 2017.  
1149 Human cytomegalovirus glycoprotein complex gH/gL/gO uses PDGFR-alpha as a key for  
1150 entry. *PLoS Pathog* 13:e1006281.
- 1151 6. Kabanova A, Marcandalli J, Zhou T, Bianchi S, Baxa U, Tsybovsky Y, Lilleri D, Silacci-Fregni  
1152 C, Foglierini M, Fernandez-Rodriguez BM, Druz A, Zhang B, Geiger R, Pagani M, Sallusto  
1153 F, Kwong PD, Corti D, Lanzavecchia A, Perez L. 2016. Platelet-derived growth factor-  
1154 alpha receptor is the cellular receptor for human cytomegalovirus gHgLgO trimer. *Nat*  
1155 *Microbiol* 1:16082.
- 1156 7. Wu K, Oberstein A, Wang W, Shenk T. 2018. Role of PDGF receptor-alpha during human  
1157 cytomegalovirus entry into fibroblasts. *Proc Natl Acad Sci U S A*  
1158 doi:10.1073/pnas.1806305115.
- 1159 8. Nguyen CC, Siddiquey MNA, Zhang H, Li G, Kamil JP. 2018. Human Cytomegalovirus  
1160 Tropism Modulator UL148 Interacts with SEL1L, a Cellular Factor That Governs  
1161 Endoplasmic Reticulum-Associated Degradation of the Viral Envelope Glycoprotein gO. *J*  
1162 *Virol* 92:e00688-18.
- 1163 9. Wang ECY, Pjechova M, Nightingale K, Vlahava VM, Patel M, Ruckova E, Forbes SK,  
1164 Nobre L, Antrobus R, Roberts D, Fielding CA, Seirafian S, Davies J, Murrell I, Lau B, Wilkie  
1165 GS, Suarez NM, Stanton RJ, Vojtesek B, Davison A, Lehner PJ, Weekes MP, Wilkinson  
1166 GWG, Tomasec P. 2018. Suppression of costimulation by human cytomegalovirus  
1167 promotes evasion of cellular immune defenses. *Proc Natl Acad Sci U S A* 115:4998-5003.
- 1168 10. Siddiquey MNA, Zhang H, Nguyen CC, Domma AJ, Kamil JP. 2018. The Human  
1169 Cytomegalovirus Endoplasmic Reticulum-Resident Glycoprotein UL148 Activates the  
1170 Unfolded Protein Response. *J Virol* 92:e00896-18.
- 1171 11. Das S, Vasanji A, Pellett PE. 2007. Three-dimensional structure of the human  
1172 cytomegalovirus cytoplasmic virion assembly complex includes a reoriented secretory  
1173 apparatus. *J Virol* 81:11861-9.
- 1174 12. Sanchez V, Greis KD, Sztul E, Britt WJ. 2000. Accumulation of virion tegument and  
1175 envelope proteins in a stable cytoplasmic compartment during human cytomegalovirus  
1176 replication: characterization of a potential site of virus assembly. *J Virol* 74:975-86.

- 1177 13. Lilley BN, Ploegh HL. 2005. Multiprotein complexes that link dislocation, ubiquitination,  
1178 and extraction of misfolded proteins from the endoplasmic reticulum membrane. *Proc*  
1179 *Natl Acad Sci U S A* 102:14296-301.
- 1180 14. Kamhi-Nesher S, Shenkman M, Tolchinsky S, Fromm SV, Ehrlich R, Lederkremer GZ.  
1181 2001. A novel quality control compartment derived from the endoplasmic reticulum.  
1182 *Mol Biol Cell* 12:1711-23.
- 1183 15. Leitman J, Shenkman M, Gofman Y, Shtern NO, Ben-Tal N, Hendershot LM, Lederkremer  
1184 GZ. 2014. Herp coordinates compartmentalization and recruitment of HRD1 and  
1185 misfolded proteins for ERAD. *Mol Biol Cell* 25:1050-60.
- 1186 16. Houck SA, Ren HY, Madden VJ, Bonner JN, Conlin MP, Janovick JA, Conn PM, Cyr DM.  
1187 2014. Quality control autophagy degrades soluble ERAD-resistant conformers of the  
1188 misfolded membrane protein GnRHR. *Mol Cell* 54:166-179.
- 1189 17. Sturgill ER, Malouli D, Hansen SG, Burwitz BJ, Seo S, Schneider CL, Womack JL, Verweij  
1190 MC, Ventura AB, Bhusari A, Jeffries KM, Legasse AW, Axthelm MK, Hudson AW, Sacha  
1191 JB, Picker LJ, Fruh K. 2016. Natural Killer Cell Evasion Is Essential for Infection by Rhesus  
1192 Cytomegalovirus. *PLoS Pathog* 12:e1005868.
- 1193 18. Chaumorcel M, Souquere S, Pierron G, Codogno P, Esclatine A. 2008. Human  
1194 cytomegalovirus controls a new autophagy-dependent cellular antiviral defense  
1195 mechanism. *Autophagy* 4:46-53.
- 1196 19. Chaumorcel M, Lussignol M, Mouna L, Cavnac Y, Fahie K, Cotte-Laffitte J, Geballe A,  
1197 Brune W, Beau I, Codogno P, Esclatine A. 2012. The human cytomegalovirus protein  
1198 TRS1 inhibits autophagy via its interaction with Beclin 1. *J Virol* 86:2571-84.
- 1199 20. Alwine JC. 2012. The human cytomegalovirus assembly compartment: a masterpiece of  
1200 viral manipulation of cellular processes that facilitates assembly and egress. *PLoS Pathog*  
1201 8:e1002878.
- 1202 21. Das S, Pellett PE. 2011. Spatial relationships between markers for secretory and  
1203 endosomal machinery in human cytomegalovirus-infected cells versus those in  
1204 uninfected cells. *J Virol* 85:5864-79.
- 1205 22. Leitman J, Ron E, Ogen-Shtern N, Lederkremer GZ. 2013. Compartmentalization of  
1206 endoplasmic reticulum quality control and ER-associated degradation factors. *DNA Cell*  
1207 *Biol* 32:2-7.
- 1208 23. Cox DW, Billingsley GD, Callahan JW. 1986. Aggregation of plasma Z type alpha 1-  
1209 antitrypsin suggests basic defect for the deficiency. *FEBS Lett* 205:255-60.
- 1210 24. Le A, Ferrell GA, Dishon DS, Le QQ, Sifers RN. 1992. Soluble aggregates of the human PiZ  
1211 alpha 1-antitrypsin variant are degraded within the endoplasmic reticulum by a  
1212 mechanism sensitive to inhibitors of protein synthesis. *J Biol Chem* 267:1072-80.
- 1213 25. Lomas DA, Evans DL, Finch JT, Carrell RW. 1992. The mechanism of Z alpha 1-antitrypsin  
1214 accumulation in the liver. *Nature* 357:605-7.
- 1215 26. Ordonez A, Snapp EL, Tan L, Miranda E, Marciniak SJ, Lomas DA. 2013. Endoplasmic  
1216 reticulum polymers impair luminal protein mobility and sensitize to cellular stress in  
1217 alpha1-antitrypsin deficiency. *Hepatology* 57:2049-60.
- 1218 27. Ekeowa UI, Freeke J, Miranda E, Gooptu B, Bush MF, Perez J, Teckman J, Robinson CV,  
1219 Lomas DA. 2010. Defining the mechanism of polymerization in the serpinopathies. *Proc*  
1220 *Natl Acad Sci U S A* 107:17146-51.

- 1221 28. Suhy DA, Giddings TH, Jr., Kirkegaard K. 2000. Remodeling the endoplasmic reticulum by  
1222 poliovirus infection and by individual viral proteins: an autophagy-like origin for virus-  
1223 induced vesicles. *J Virol* 74:8953-65.
- 1224 29. Windsor M, Hawes P, Monaghan P, Snapp E, Salas ML, Rodriguez JM, Wileman T. 2012.  
1225 Mechanism of collapse of endoplasmic reticulum cisternae during African swine fever  
1226 virus infection. *Traffic* 13:30-42.
- 1227 30. Miller S, Krijnse-Locker J. 2008. Modification of intracellular membrane structures for  
1228 virus replication. *Nat Rev Microbiol* 6:363-74.
- 1229 31. Siddiquey MNA, Zhang H, Nguyen CC, Domma AJ, Kamil JP. 2018. The human  
1230 cytomegalovirus ER resident glycoprotein UL148 activates the unfolded protein  
1231 response. *J Virol* doi:10.1128/JVI.00896-18.
- 1232 32. Cormack BP, Valdivia RH, Falkow S. 1996. FACS-optimized mutants of the green  
1233 fluorescent protein (GFP). *Gene* 173:33-8.
- 1234 33. Khaminets A, Heinrich T, Mari M, Grumati P, Huebner AK, Akutsu M, Liebmann L, Stolz  
1235 A, Nietzsche S, Koch N, Mauthe M, Katona I, Qualmann B, Weis J, Reggiori F, Kurth I,  
1236 Hubner CA, Dikic I. 2015. Regulation of endoplasmic reticulum turnover by selective  
1237 autophagy. *Nature* 522:354-8.
- 1238 34. Meng L, Mohan R, Kwok BH, Elofsson M, Sin N, Crews CM. 1999. Epoxomicin, a potent  
1239 and selective proteasome inhibitor, exhibits in vivo antiinflammatory activity. *Proc Natl*  
1240 *Acad Sci U S A* 96:10403-8.
- 1241 35. Muroi M, Shiragami N, Nagao K, Yamasaki M, Takatsuki A. 1993. Folimycin  
1242 (concanamycin A), a specific inhibitor of V-ATPase, blocks intracellular translocation of  
1243 the glycoprotein of vesicular stomatitis virus before arrival to the Golgi apparatus. *Cell*  
1244 *Struct Funct* 18:139-49.
- 1245 36. Muroi M, Takasu A, Yamasaki M, Takatsuki A. 1993. Folimycin (concanamycin A), an  
1246 inhibitor of V-type H(+)-ATPase, blocks cell-surface expression of virus-envelope  
1247 glycoproteins. *Biochem Biophys Res Commun* 193:999-1005.
- 1248 37. Kondratyev M, Avezov E, Shenkman M, Groisman B, Lederkremer GZ. 2007. PERK-  
1249 dependent compartmentalization of ERAD and unfolded protein response machineries  
1250 during ER stress. *Exp Cell Res* 313:3395-407.
- 1251 38. Harding HP, Novoa I, Zhang Y, Zeng H, Wek R, Schapira M, Ron D. 2000. Regulated  
1252 translation initiation controls stress-induced gene expression in mammalian cells. *Mol*  
1253 *Cell* 6:1099-108.
- 1254 39. Palam LR, Baird TD, Wek RC. 2011. Phosphorylation of eIF2 facilitates ribosomal bypass  
1255 of an inhibitory upstream ORF to enhance CHOP translation. *J Biol Chem* 286:10939-49.
- 1256 40. Vattem KM, Wek RC. 2004. Reinitiation involving upstream ORFs regulates ATF4 mRNA  
1257 translation in mammalian cells. *Proc Natl Acad Sci U S A* 101:11269-74.
- 1258 41. Sidrauski C, Acosta-Alvear D, Khoutorsky A, Vedantham P, Hearn BR, Li H, Gamache K,  
1259 Gallagher CM, Ang KK, Wilson C, Okreglak V, Ashkenazi A, Hann B, Nader K, Arkin MR,  
1260 Renslo AR, Sonenberg N, Walter P. 2013. Pharmacological brake-release of mRNA  
1261 translation enhances cognitive memory. *Elife* 2:e00498.
- 1262 42. Sidrauski C, McGeachy AM, Ingolia NT, Walter P. 2015. The small molecule ISRIB  
1263 reverses the effects of eIF2alpha phosphorylation on translation and stress granule  
1264 assembly. *Elife* 4.

- 1265 43. Zyryanova AF, Weis F, Faille A, Alard AA, Crespillo-Casado A, Sekine Y, Harding HP, Allen  
1266 F, Parts L, Fromont C, Fischer PM, Warren AJ, Ron D. 2018. Binding of ISRIB reveals a  
1267 regulatory site in the nucleotide exchange factor eIF2B. *Science* 359:1533-1536.
- 1268 44. Sidrauski C, Tsai JC, Kampmann M, Hearn BR, Vedantham P, Jaishankar P, Sokabe M,  
1269 Mendez AS, Newton BW, Tang EL, Verschueren E, Johnson JR, Krogan NJ, Fraser CS,  
1270 Weissman JS, Renslo AR, Walter P. 2015. Pharmacological dimerization and activation of  
1271 the exchange factor eIF2B antagonizes the integrated stress response. *Elife* 4:e07314.
- 1272 45. Tsai JC, Miller-Vedam LE, Anand AA, Jaishankar P, Nguyen HC, Renslo AR, Frost A, Walter  
1273 P. 2018. Structure of the nucleotide exchange factor eIF2B reveals mechanism of  
1274 memory-enhancing molecule. *Science* 359.
- 1275 46. Gordiyenko Y, Schmidt C, Jennings MD, Matak-Vinkovic D, Pavitt GD, Robinson CV. 2014.  
1276 eIF2B is a decameric guanine nucleotide exchange factor with a gamma2epsilon2  
1277 tetrameric core. *Nat Commun* 5:3902.
- 1278 47. Harding HP, Zhang Y, Ron D. 1999. Protein translation and folding are coupled by an  
1279 endoplasmic-reticulum-resident kinase. *Nature* 397:271-4.
- 1280 48. Harding HP, Zhang Y, Bertolotti A, Zeng H, Ron D. 2000. Perk is essential for translational  
1281 regulation and cell survival during the unfolded protein response. *Mol Cell* 5:897-904.
- 1282 49. Axten JM, Medina JR, Feng Y, Shu A, Romeril SP, Grant SW, Li WH, Heerding DA,  
1283 Minthorn E, Mencken T, Atkins C, Liu Q, Rabindran S, Kumar R, Hong X, Goetz A, Stanley  
1284 T, Taylor JD, Sigethy SD, Tomberlin GH, Hassell AM, Kahler KM, Shewchuk LM, Gampe  
1285 RT. 2012. Discovery of 7-methyl-5-(1-[[3-(trifluoromethyl)phenyl]acetyl]-2,3-dihydro-1H-  
1286 indol-5-yl)-7H-pyrrolo[2,3-d]pyrimidin-4-amine (GSK2606414), a potent and selective  
1287 first-in-class inhibitor of protein kinase R (PKR)-like endoplasmic reticulum kinase  
1288 (PERK). *J Med Chem* 55:7193-207.
- 1289 50. Tenorio R, Fernandez de Castro I, Knowlton JJ, Zamora PF, Lee CH, Mainou BA, Dermody  
1290 TS, Risco C. 2018. Reovirus sigmaNS and muNS Proteins Remodel the Endoplasmic  
1291 Reticulum to Build Replication Neo-Organelles. *MBio* 9.
- 1292 51. Miller S, Kastner S, Krijnse-Locker J, Buhler S, Bartenschlager R. 2007. The non-structural  
1293 protein 4A of dengue virus is an integral membrane protein inducing membrane  
1294 alterations in a 2K-regulated manner. *J Biol Chem* 282:8873-82.
- 1295 52. Lamond AI, Sleeman JE. 2003. Nuclear substructure and dynamics. *Curr Biol* 13:R825-8.
- 1296 53. Granell S, Baldini G, Mohammad S, Nicolini V, Narducci P, Storrie B, Baldini G. 2008.  
1297 Sequestration of mutated alpha1-antitrypsin into inclusion bodies is a cell-protective  
1298 mechanism to maintain endoplasmic reticulum function. *Mol Biol Cell* 19:572-86.
- 1299 54. Lawless MW, Greene CM, Mulgrew A, Taggart CC, O'Neill SJ, McElvaney NG. 2004.  
1300 Activation of endoplasmic reticulum-specific stress responses associated with the  
1301 conformational disease Z alpha 1-antitrypsin deficiency. *J Immunol* 172:5722-6.
- 1302 55. Tirosh B, Iwakoshi NN, Lilley BN, Lee AH, Glimcher LH, Ploegh HL. 2005. Human  
1303 cytomegalovirus protein US11 provokes an unfolded protein response that may  
1304 facilitate the degradation of class I major histocompatibility complex products. *J Virol*  
1305 79:2768-79.
- 1306 56. Wiertz EJ, Jones TR, Sun L, Bogyo M, Geuze HJ, Ploegh HL. 1996. The human  
1307 cytomegalovirus US11 gene product dislocates MHC class I heavy chains from the  
1308 endoplasmic reticulum to the cytosol. *Cell* 84:769-79.

- 1309 57. van den Boomen DJ, Timms RT, Grice GL, Stagg HR, Skodt K, Dougan G, Nathan JA,  
1310 Lehner PJ. 2014. TMEM129 is a Derlin-1 associated ERAD E3 ligase essential for virus-  
1311 induced degradation of MHC-I. *Proc Natl Acad Sci U S A* 111:11425-30.
- 1312 58. Caramelo JJ, Parodi AJ. 2008. Getting in and out from calnexin/calreticulin cycles. *J Biol*  
1313 *Chem* 283:10221-5.
- 1314 59. Hammond C, Braakman I, Helenius A. 1994. Role of N-linked oligosaccharide  
1315 recognition, glucose trimming, and calnexin in glycoprotein folding and quality control.  
1316 *Proc Natl Acad Sci U S A* 91:913-7.
- 1317 60. Zhou M, Yu Q, Wechsler A, Ryckman BJ. 2013. Comparative analysis of gO isoforms  
1318 reveals that strains of human cytomegalovirus differ in the ratio of gH/gL/gO and  
1319 gH/gL/UL128-131 in the virion envelope. *J Virol* 87:9680-90.
- 1320 61. Zhang L, Zhou M, Stanton R, Kamil J, Ryckman BJ. 2018. Expression Levels of  
1321 Glycoprotein O (gO) Vary between Strains of Human Cytomegalovirus, Influencing the  
1322 Assembly of gH/gL Complexes and Virion Infectivity. *J Virol* 92.
- 1323 62. Sifers RN, Brashears-Macatee S, Kidd VJ, Muensch H, Woo SL. 1988. A frameshift  
1324 mutation results in a truncated alpha 1-antitrypsin that is retained within the rough  
1325 endoplasmic reticulum. *J Biol Chem* 263:7330-5.
- 1326 63. Choudhury P, Liu Y, Bick RJ, Sifers RN. 1997. Intracellular association between UDP-  
1327 glucose:glycoprotein glucosyltransferase and an incompletely folded variant of alpha1-  
1328 antitrypsin. *J Biol Chem* 272:13446-51.
- 1329 64. Tsao YS, Ivessa NE, Adesnik M, Sabatini DD, Kreibich G. 1992. Carboxy terminally  
1330 truncated forms of ribophorin I are degraded in pre-Golgi compartments by a calcium-  
1331 dependent process. *J Cell Biol* 116:57-67.
- 1332 65. de Virgilio M, Weninger H, Ivessa NE. 1998. Ubiquitination is required for the retro-  
1333 translocation of a short-lived luminal endoplasmic reticulum glycoprotein to the cytosol  
1334 for degradation by the proteasome. *J Biol Chem* 273:9734-43.
- 1335 66. Johnston JA, Ward CL, Kopito RR. 1998. Aggresomes: a cellular response to misfolded  
1336 proteins. *J Cell Biol* 143:1883-98.
- 1337 67. Johnston JA, Illing ME, Kopito RR. 2002. Cytoplasmic dynein/dynactin mediates the  
1338 assembly of aggresomes. *Cell Motil Cytoskeleton* 53:26-38.
- 1339 68. Pankiv S, Alemu EA, Brech A, Bruun JA, Lamark T, Overvatn A, Bjorkoy G, Johansen T.  
1340 2010. FYCO1 is a Rab7 effector that binds to LC3 and PI3P to mediate microtubule plus  
1341 end-directed vesicle transport. *J Cell Biol* 188:253-69.
- 1342 69. Hummel T, Krukkert K, Roos J, Davis G, Klambt C. 2000. *Drosophila* Futsch/22C10 is a  
1343 MAP1B-like protein required for dendritic and axonal development. *Neuron* 26:357-70.
- 1344 70. Wang H, Bedford FK, Brandon NJ, Moss SJ, Olsen RW. 1999. GABA(A)-receptor-  
1345 associated protein links GABA(A) receptors and the cytoskeleton. *Nature* 397:69-72.
- 1346 71. Zhang K, Daigle JG, Cunningham KM, Coyne AN, Ruan K, Grima JC, Bowen KE, Wadhwa  
1347 H, Yang P, Rigo F, Taylor JP, Gitler AD, Rothstein JD, Lloyd TE. 2018. Stress Granule  
1348 Assembly Disrupts Nucleocytoplasmic Transport. *Cell* 173:958-971 e17.
- 1349 72. Li YR, King OD, Shorter J, Gitler AD. 2013. Stress granules as crucibles of ALS  
1350 pathogenesis. *J Cell Biol* 201:361-72.
- 1351 73. Hetz C, Saxena S. 2017. ER stress and the unfolded protein response in  
1352 neurodegeneration. *Nat Rev Neurol* 13:477-491.

- 1353 74. Kirchoff V, Wong S, St JS, Pari GS. 2002. Generation of a life-expanded rhesus monkey  
1354 fibroblast cell line for the growth of rhesus rhadinovirus (RRV). *Arch Virol* 147:321-33.
- 1355 75. Sinzger C, Hahn G, Digel M, Katona R, Sampaio KL, Messerle M, Hengel H, Koszinowski U,  
1356 Brune W, Adler B. 2008. Cloning and sequencing of a highly productive, endotheliotropic  
1357 virus strain derived from human cytomegalovirus TB40/E. *J Gen Virol* 89:359-68.
- 1358 76. Smith IL, Taskintuna I, Rahhal FM, Powell HC, Ai E, Mueller AJ, Spector SA, Freeman WR.  
1359 1998. Clinical failure of CMV retinitis with intravitreal cidofovir is associated with  
1360 antiviral resistance. *Arch Ophthalmol* 116:178-85.
- 1361 77. Murphy E, Yu D, Grimwood J, Schmutz J, Dickson M, Jarvis MA, Hahn G, Nelson JA,  
1362 Myers RM, Shenk TE. 2003. Coding potential of laboratory and clinical strains of human  
1363 cytomegalovirus. *Proc Natl Acad Sci U S A* 100:14976-81.
- 1364 78. Stanton RJ, Baluchova K, Dargan DJ, Cunningham C, Sheehy O, Seirafian S, McSharry BP,  
1365 Neale ML, Davies JA, Tomasec P, Davison AJ, Wilkinson GW. 2010. Reconstruction of the  
1366 complete human cytomegalovirus genome in a BAC reveals RL13 to be a potent inhibitor  
1367 of replication. *J Clin Invest* 120:3191-208.
- 1368 79. Hobom U, Brune W, Messerle M, Hahn G, Koszinowski UH. 2000. Fast screening  
1369 procedures for random transposon libraries of cloned herpesvirus genomes: mutational  
1370 analysis of human cytomegalovirus envelope glycoprotein genes. *J Virol* 74:7720-9.
- 1371 80. Chang WL, Barry PA. 2003. Cloning of the full-length rhesus cytomegalovirus genome as  
1372 an infectious and self-excisable bacterial artificial chromosome for analysis of viral  
1373 pathogenesis. *J Virol* 77:5073-83.
- 1374 81. Tischer BK, Smith GA, Osterrieder N. 2010. En passant mutagenesis: a two step  
1375 markerless red recombination system. *Methods Mol Biol* 634:421-30.
- 1376 82. Tischer BK, von Einem J, Kaufer B, Osterrieder N. 2006. Two-step red-mediated  
1377 recombination for versatile high-efficiency markerless DNA manipulation in *Escherichia*  
1378 *coli*. *Biotechniques* 40:191-7.
- 1379 83. Dietz AN, Villinger C, Becker S, Frick M, von Einem J. 2018. A Tyrosine-Based Trafficking  
1380 Motif of the Tegument Protein pUL71 Is Crucial for Human Cytomegalovirus Secondary  
1381 Envelopment. *J Virol* 92.
- 1382 84. Hohn K, Sailer M, Wang L, Lorenz M, Schneider ME, Walther P. 2011. Preparation of  
1383 cryofixed cells for improved 3D ultrastructure with scanning transmission electron  
1384 tomography. *Histochem Cell Biol* 135:1-9.
- 1385 85. Villinger C, Schauflinger M, Gregorius H, Kranz C, Hohn K, Nafeey S, Walther P. 2014.  
1386 Three-dimensional imaging of adherent cells using FIB/SEM and STEM. *Methods Mol*  
1387 *Biol* 1117:617-38.
- 1388 86. Kremer JR, Mastrorarde DN, McIntosh JR. 1996. Computer visualization of three-  
1389 dimensional image data using IMOD. *J Struct Biol* 116:71-6.
- 1390 87. Britt WJ, Jarvis MA, Drummond DD, Mach M. 2005. Antigenic domain 1 is required for  
1391 oligomerization of human cytomegalovirus glycoprotein B. *J Virol* 79:4066-79.
- 1392
- 1393
